# Supplementary material for: Variation in proviral content among human genomes mediated by LTR recombination
Source: PubMed Central journal article supplement (PMC6298018; doi:10.1186/s13100-018-0142-3), 2018-12-18
Supplement: 13100_2018_142_MOESM2_ESM.pdf [file 13100_2018_142_MOESM2_ESM.pdf]

**Additional file 2. HERV candidates identified as solo LTR to provirus variants using *findprovirus* pipeline**

| HERV name               | Hg38 coordinates               | discordant reads | Mappability scores*    | #individuals | NCBI accessions                                      | Previously reported          |
|-------------------------|--------------------------------|------------------|------------------------|--------------|------------------------------------------------------|------------------------------|
| 1p31.1_K2               | chr1:73129298-73130265         | 1-16             | 0.143-0.256<br>(0.222) | 264          | AC212296.2<br>AC244103.1                             | (46)                         |
| 5q11.2_K3               | chr5:59463786-59464754         | 1-6              | 0.229<br>(0.229)       | 164          |                                                      | This study                   |
| K111/K105               | chrUn_GL000219v1:175210-176178 | 1-35             | NA                     | NA           | GU476554.2                                           | (29,44)                      |
| 12q13.2_K1 <sup>§</sup> | chr12:55333531-55334299        | -                | (0.053)                | -            | -                                                    | (39)                         |
| 10p12.1_K2 <sup>§</sup> | chr10:26893570-26894337        | -                | (0.024)                | -            | -                                                    | (38)                         |
| 4q22.1_H8               | chr4:91045790-91046151         | 1-23             | 0.276-1.0<br>(0.521)   | 265          | AC226758.3<br>AC210774.3                             | This study<br>(PCR verified) |
| 5p15.31_H2              | chr5:7262337-7262742           | 1-6              | 1.0<br>(1.0)           | 117          | AC226159.3                                           | This study<br>(PCR verified) |
| 18q21.1_W2              | chr18:50449151-50449914        | 3-33             | 0.413-1.0<br>(0.707)   | 194          | AC241669.2<br>AC203657.2<br>AC241258.1<br>AC013759.6 | This study<br>(PCR verified) |

Footnotes: NA- Not applicable. (\*) range of mappability scores identified for the genomic regions where discordant reads are mapped. The average mappability is given in brackets. These data are collected from the individual that had the most informative discordant reads (where mates had significant homology with the respective HERV internal sequence) mapped to the solo LTR. (°) Not identified as dimorphic using our pipeline.
