# Supplementary material for: Variation in proviral content among human genomes mediated by LTR recombination
Source: PubMed Central journal article supplement (PMC6298018; doi:10.1186/s13100-018-0142-3), 2018-12-18
Supplement: 13100_2018_142_MOESM3_ESM.pdf [file 13100_2018_142_MOESM3_ESM.pdf]

### Additional file 3. Sequence verification of non-reference solo LTR or provirus alleles

>S\_Yadava-1\_18q21.1\_W2\_env\_partial\_sequence

GGAAATCTCNCTGCACAACCCCTACTACACCCCAATTTCAGCAGGAAGCAGTTAGAGCAGTTGTCAGCCAACCTCCCC  
AACAGCACTTGGGTTTTCTGTTGAGAGGGGGGACTGAGAGACAGGACTAGCTGGATTTCTAGGCCAACTAAGAAT  
CCCTAAGCCTAGCTGGGAAGGTGACCGCATCCACCTTTAAACATGGGGCTTGCAACTTAGCTCACACCGGCCAACCA  
GGTAATAAAGAGAGCTCACTAAAATGCTAATCAGGCCAAAAACAGCAGGTAAAAAATAGCCAATCATCTTTTCGCCTG  
AGACCACAGTGGGCGGGACAATGATCAGGATATAAACCCAGGCATTCAAGCCAGCAATGGCTACCCTCTTTGGGTCC  
CCTCCCTTTGTATGGGAGCTCTGTTTTCGCTCTATTAATCTTGCAACTGCGCTCTCTTCTGGTGCATGTTTGCTAT  
GGCTCGGCTCTAGCTGAGCTTTTGTTCACTGTCCACCCTGCTGTTTGCTGCCGCCGACAGACCTGCCACTGACTTCC  
ATCCCTTCGGATTCCGGCAGGGTGTCTCTGTGCCCCTGATCCAGCAAGGCACCCATTGCTGCTCCTGATCAGGCTAA  
AGTCTTGCCATTGTTTCTGCATGGCTAAGTGCCAGGTTTCATCTAATTGAGCTGAACACTAGTCACTGGGTTTACA  
GTTCTCTTCCGTGACCCATGGCTTCTAATAGAGCTATAACACTCACTGCATGGCCCAAGATTCCATTCTTGGAAATC  
CATGAGGCCAAGAACCCCNCTCAGAGAACACGAGGCTTGCCACCATTTTGAAGTGGCCTGCCGCCATCTTGGGAGC  
TCTGGGANCAAGGACTCCCCCGGTAACACTACCATCATCTCTCATCTGATAAGTGAAATAGCCTA

>S\_Yadava-2\_18q21.1\_W2\_env\_partial\_sequence

AATCTCNNTGCACAACCCCTACTACACCCCAATTTCAGCAGGAAGCAGTTAGAGCAGTTGTCAGCCAACCTCCCCAAC  
AGCACTTGGGTTTTCTGTTGAGAGGGGGGACTGAGAGACAGGACTAGCTGGATTTCTAGGCCAACTAAGAATCCC  
TAAGCCTAGCTGGGAAGGTGACCGCATCCACCTTTAAACATGGGGCTTGCAACTTAGCTCACACCGGCCAACCCAGGT  
AATAAAGAGAGCTCACTAAAATGCTAATCAGGCCAAAAACAGCAGGTAAAAAATAGCCAATCATCTTTTCGCCTGAGA  
CCACAGTGGGCGGGACAATGATCAGGATATAAACCCAGGCATTCAAGCCAGCAATGGCTACCCTCTTTGGGTCCCCT  
CCCTTTGTATGGGAGCTCTGTTTTCGCTCTATTAATCTTGCAACTGCGCTCTCTTCTGGTGCATGTTTGCTATGGC  
TCGGCTCTAGCTGAGCTTTTGTTCACTGTCCACCCTGCTGTTTGCTGCCGCCGACAGACCTGCCACTGACTTCCATC  
CCTTCGGATTCCGGCAGGGTGTCTCTGTGCCCCTGATCCAGCAAGGCACCCATTGCTGCTCCTGATCAGGCTAAAGT  
CTTGCCATTGTTTCTGCATGGCTAAGTGCCAGGTTTCATCTAATTGAGCTGAACACTAGTCACTGGGTTTACAGTT  
CTCTTCCGTGACCCATGGCTTCTAATAGAGCTATAACACTCACTGCATGGCCCAAGATTCCATTCTTGGAAATCCAT  
GAGGCCAAGAACCCAGGTGAGAGAACACGAGGCTTGCCACCATTTTGAAGTGGCCTGCCGCCATCTTGGGAGCTC  
TGGGAGCAAGGACTCCCCCGGTAACACTACCATCATCTCTCATCTGAATAAGTGAAATAGCCTAC

>S\_Mala-3\_18q21.1\_W2\_env\_partial\_sequence

GGTAGTGTTACCGGGGAGTCTTGTCTCCAGAGCTCCCAAGATGGCGGCAGGCCACTTCCAAAATGGTGGCAAGCC  
TCGTGTTCTCTGACCTGGGGTTCTTGGCCTCATGGATTCCAAGGAATGGAATCTTGGGCCATGCAGTGAGTGTTATA  
GCTCTATTAGAAGCCATGGGTACGGAAGAGAAGTGTGAACCCAGTGACTAGTGTTTCACTCAATTAGGATGAACCT  
GGGCACTTAGCCATGCAGGAACAATGGCAAGACTTTAGCCTGATCAGGAGCAGCAATGGGTGCCTTGTGGATCAGG  
GGCACAGAGGACACCCTGCCGAATCCGAAGGGATGGAAGTCAGTGGCAGGTCTGCGGCGGCAGCAAAACAGCAGTGGT  
GGACAGTGAACAAAAGCTCAGCTAGAGCCGAGCCATAGCAAACATGCACCAGAAGAGAGCGCAGTTGCAAGATTTAA  
TAGAGCGAAAACAGAGCTCCCATACAAAGGGAGGGGACCCAAAGAGGGTAGCCATTGCTGGCTTGAATGCCTGGGTT  
TATATCCTGATCATTGTCCC GCCACTGTGGTCTCAGGCGAAAGATGATTGGCTATTTTTTTTACCTGCTGTTTTTGC  
CTGATTAGCATTTTTAGTGAGCTCTCTTTATTACCTGGTTGGCCGGTGTGAGCTAAGTTGCAAGCCCCATGTTTAAAG  
GTGGATGCGGTACCTTCCCAGCTAGGCTTANGGATTCTTAGTTGGCCTANGAAATCCAGCTAGTCTCTCTCTCAG  
TCCCCCTCTCAACAGGAAAACCCAAGTGTGTTGGGGAGGTTGGCTGACAACCTGCTCTAACTGCTTCTGCTGAAT  
TGGGGTGTAGTAGGGGTTGTGCAGTTGAGATTTCTTGGGAGGGTGCNTTGTATGTCAT

>S\_Kapu-1\_18q21.1\_W2\_gag\_partial\_sequence

GANAGCAAGCGNAAGAGGTCCAATATTACTCACTGCTTTGGAGATCTCTTCGTGGTTACCAAAATGTCACCGGGGGT  
TCCTTGCTCCCAGAGCTCCCAAGATGGCAGCAGGCCACTTCCAAGATGGTGGCAAGCCTTGGCCTCACGGATTCCAA  
AGAATGGAATCTTGCACCATGCGATGAGTGTTATAGCTCTATTAGAAGCCGTGGGTACCGGAAGAGAACCATTGGAAC  
CCAGTGACTAGTGTTTCACTCAATTAGGACAAATCTGGGCATTAGCCATGCAGGAACAATGGCAAGACTTTAGCCC  
GATCAGGAGCAGCAATGCGTGCCTTGTAGTACAGGACACAGAGCACCCCTGCCGGATCCGAAGGGATGGAAGTTC  
AGCAGCGGGTCTGCGGTGGTGGCAAACAGCAGTGGTGGACAGTGAGCGAAAGCTCAGCTTGAGCCAAGCCATAACAA  
ACATGCACCAGAAGAGAGCGCAGTTGCAAGATTTAATAGAGCGAAAACAGAGCTCCCATACAAAGGGAGGGGACCCA  
AAGAGGGTAGCCATTGCCAGCTTGAAGGCCTGGGTTTATATCCCAGTATTGTCCTTACTGTGCTCTCAGGCAA  
TAGGTGATTGGCTATTTCTTTTACCTCCTGTTTTTGCCTAATTAGCATTTTTAGTGAGCTCTCTTTATTACCTGGTTGG  
TCGGTGTGAGCTAAGTTGCAAGCCCCATGTTTAAAGGTGGATGTGGTACCTTCCCAGCTAGGCTTAGGGATTCTTA  
GTCAGCCTAGGAAATCCAGCTTGTCTGTCTCTCAGTAGCATGAGCAATATTGGTGACAGAGAGGAAGAGCTGAATT  
CAGTAGACCTGATGATGGTTGGATAG

>S\_Yadava-1\_18q21.1\_W2\_gag\_partial\_sequence

GCTCTTCCTCTCTGTACCAATATTGCTCATGCTACTGAGAGACAGGACAAGCTGGATTTCTAGGCTGACTAAGAA  
TCCCTAAGCCTAGCTGGGAAGGTGACCACATCCACCTTTAAACATGGGGCTTGCAACTTAGCTCACACCGACCAACC  
AGGTAATAAAGAGAGCTCACTAAAATGCTAATTAGGCAAAAACAGGAGGTAAAGAAATAGCCAATCACCTATTGCCT  
GAGAGCACAGTGAGGGGGACAATGATCGGGATATAAACCCAGGCCTTCAAGCTGGCAATGGCTACCCTCTTTGGGTC  
CCCTCCCTTTGTATGGGAGCTCTGTTTTCGCTCTATTAAATCTTGCAACTGCGCTCTCTTCTGGTGCATGTTTGTTA  
TGGCTTGGCTCAAGCTGAGCTTTGCTCACTGTCCACCACTGCTGTTTGCCACCACCGCAGACCCGCTGCTGACTTC  
CATCCCTTCGGATCCGGCAGGGTGTCTCTGTGCTCCTGATCTAGCAAGGCACGCATTGCTGCTCCTGATCGGGCTA  
AAGTCTTGCCATTGTTCTGCATGGCTAAGTGCCAGATTTGCTCCTAATTGAGCTGAACACTAGTCACTGGGTTCCA  
TGGTTCTCTTCCGTGACCCAGGCTTCTAATAGAGCTATAACACTCATCGCATGGTGCAAGATTCCATTCTTTGGAA  
TCCGTGAGGCCAAGGCTTGCCACCATCTTGAAGTGGCCTGCTGCCATCTTGGGAGCTCTGGGAGCAAGGAACCCCC  
GGTGACATTTTGGTAACCACGAAGAGATCTCCAAAGCAGTGAGTAATATTGGACCTCTTTCGCTTGTATTCTGTCC  
TATCCTTCCTTAGAATTG

>S\_Mala-1\_4q22.1\_H8\_env\_partial\_sequence

TGAGAAACATCGCCCCATTATCTCTCCATACCACCCCAACACTTCAACACTATTTTATTTTTCTTATTAATATAAG  
AAGACAGGAATGTCAGGCCTCTGAGCCCAAGCCTGCATATATACATCCAGATGGCCTGAAGCAAGTGAAGAATCACA  
AAAKAAGTGAAAATGGCCGGTTCCTGCCTTAACTGATGACATTACCTTGTGAAATTCCTTCTCCTGGCTCAGAAGCT  
CCCCATTGAGCACCTTGTGACCCCTGCCCTGCCGGCCAGAGAACCCCTTTGACTGTAATTTTCCATTATCTACC  
CAAATCCTGTAAAACAGCCCCACCCCTATCTCCCTTYGCTGACTCTCTTTTCTGACTCAGCCRCCTGCACCCAGGT  
GATTA AAAAGCTTTATTGCTCACACAAAGCCTGTTTGGTGGTCTCTTACACGGATGCATGTGAAAATTATACCCCA  
AGATTTTGCATTATTTTTATCTTGTCTAACTATATAATGAAAACAAATTGAAAAGACCCAATATATTTAAAAGCTACT  
TTATAGGAGTTTTAAAAGAATTRTATCTATCAAGAATCTCATTATAATTGTAGATACTATGGAGGATTATGGAATA  
GAGATACACCAAATATTTCCATAATAATAATGTTTTATCTGTTTTTA

>S\_Madiga-2\_4q22.1\_H8\_env\_partial\_sequence

CCACTCTAGGTTCCACACCACCCCTAATCCCGCTGGAACAGCCCTGAGAAACATCGCCCCATTATCTCTCCATA  
CCACCCCAACACTTCAACACTATTTTATTTTTCTTATTAATATAAGAAGACAGGAATGTCAGGCCTCTGAGCCCAA  
GCCTGCATATATACATCCAGATGGCCTGAAGCAAGTGAAGAATCACAAAAGAAGTGA AAAATGGCCGGTTCCTGCCTT  
AACTGATGACATTACCTTGTGAAATTCCTTCTCCTGGCTCAGAAGCTCCCCATTGAGCACCTTGTGACCCCTGCC  
CTGCCCGCCAGAGAACCCCTTTGACTGTAATTTTCCATTATCTACCCAAATCCTGTAAAACAGCCCCACCCCTATC  
TCCCTTCGCTGACTCTCTTTTCTGACTCAGCCCGCCTGCACCCAGGTGATTA AAAAGCTTTATTGCTCACACAAAGC  
CTGTTTGGTGGTCTCTTACACGGATGCATGTGAAAATTATACCCCAAGATTTTGCATTATTTTTATCTTGTCTAAC  
TATATAATGAAAACAAATTGAAAAGACCCAATATATTTAAAAGCTACTTTATAGGAGTTTTAAAAGAATTGTATCTA  
TCAAGAATCTCATTATAATTGTAGATACTATGGAGGATTATGGAATAGAGATACACCAAATATTTCCATAATAATA  
TGTTTTATCTGTTTTTATTTTTAT

>S\_Brahmin-1\_5p15.31\_H2\_env\_partial\_sequence

TCTAGGTTCCCATGCCACCCCTAATCCCGCTCAAAGCAGCCTTGAGAAACATTGCTCATTATCTCTCCATACCACCC  
CCAAAAATTTTACCATCCCAACACTTCAGCACTATTTTCATTTTTCTTATTAATATAAGAAGACAGGAATATCAGG  
CCTCTGAGCCCAAGCTAAGCCATCATATCCCCTGTGACCTGCACGTACACATCCAGATGGCCGGTTCCTGCCTTAA  
TGATGACATTCCACCACAAAAGAAGTGA AAAATGGCCTGTTCTGCCTTAACTGATGACATTGTCTTGTGAAATTCCT  
TCTCCTGGCTCATCCTGGCTCAAAGCTCCCCTACTGAGCACCTTGTGACCCCACTCTGCCTGCCAGAGAACAACC  
CCCTTTGACTATAATTTTCTTTTATCTACTCACATCCTATAAAAATGGCCCCACCCCTATCTCCCTTCGCTGACTCTT  
TTCGGACTCAGCCTGCCTGCACCCAGGTGATTA AAAAGCTTTATTGCTCACACAAAACCTGTTTGTGGTCTCTTAC  
ACGGACGCGCATGAAAAGTTACAACCTTGA AAAATATGATACACACATTAGAAAAAAGCATGCCAATTAATGCAATTT  
ATAGAAACACAACAAAAGAACTCAGAAAAATGATGAAAAAAGATACGGTTACATACAGCAAGATGGTGTAGCTCC  
ACTCGTGAAACACAATGGACTTTAAAACAACAAGCC

>S\_Madiga-2\_5p15.31\_H2\_env\_partial\_sequence

CCCCTCTAGGTTCCCATGCCACCCCTAATCCCGCTCAAAGCAGCCTTGAGAAACATTGCTCATTATCTCTCCATAC  
CACCCCAAAAAATTTTACCATCCCAACACTTCAGCACTATTTTCATTTTTCTTATTAATATAAGAAGACAGGAATA  
TCAGGCCTCTGAGCCCAAGCTAAGCCATCATATCCCCTGTGACCTGCACGTACACATCCAGATGGCCGGTTCCTGCC  
TTAACTGATGACATTCCACCACAAAAGAAGTGA AAAATGGCCTGTTCTGCCTTAACTGATGACATTGTCTTGTGAAA  
TTCCTTCTCCTGGCTCATCCTGGCTCAAAGCTCCCCTACTGAGCACCTTGTGACCCCACTCTGCCTGCCAGAGAA  
CAACCCCTTTGACTATAATTTTCTTTTATCTACTCACATCCTATAAAAATGGCCCCACCCCTATCTCCCTTCGCTGA

CTCTTTTCGGACTCAGCCTGCCTGCACCCAGGTGATTAAAAGCTTTATTGCTCACACAAAACCTGTTTGTATGGTCTC  
TTCACAYGGACGCGCATGAAAGTTACAACCTGAAAATATGATACACACATTAGAAAAAAGCATGCCAATTAATGC  
AATTTATAGAAACACAACAAAAGAACTCAGAAAAATGATGAAAAAGATACGGTTCACATACAGCAAGATGGTGT  
GCTCCACTCGTGAAACACAATGGACTTTAAAACAACAAGC

>S\_Madiga-2\_2q34\_H4\_soloLTR

TAGGTGAAAGAGCTCACATAGCAGAGTATTGTGATATTAGCCATGATGTACTAACCATCTACATATGTTAGTTGATT  
GTAATAATAATAAAAATAATTAATTTTTAAAGATATAAACTATACTTATTGTGTCAGGTCTCTGAGCCCAAGCCAAGCCAT  
CGCATCCCCTCTGACTTGCAGGTATATGCCAGATGGCCTGAAGTAACTGAAGAATCACAAAAGAAGTAAAAATGCC  
CTGCCCGCCTTAACTGATGACATTCACCAAAAAAGAAGTGAATATGGCCGGTCCCTTGCCTTAAAGTATGACATTA  
CCTTGTGAAAGTCTTTTTCTGCTCATCCTGGCTCAAAAACCTCCCCACTGAGCACCTTGCACCCCCACTCCTGC  
CCACCAGAGAACAACCCCTTTGACTGTAATTTTTCTTTACCTGACCAAATCTTATAAAACGGCCCCACCCCTATC  
TCCCTTCTCTGACTCTTTTTTCGGACTCAGCCCGCTTGCACCCAGGTGAAATAAACAGCCATGTTGCTCACACAAAG  
CCTGTTTGGTCTCTTTCACACGGACGTGCATGAAACTTATTAATTAATAAGATAAAATAAGTGAAGTAACTAGATT  
CATTTTTAACCTGAATTAATACAAATAAGGTGAAATGGTTGGCCTACTGATTGTCTATAAGGAGCAAACCTATAAAAT  
ATCAAGTATTGTCACTGCTTGAATATGCAAATGAAAGCTGTGAATAATAATCACGTGGTCAGGGAGAGAAATAAGTT  
TAAAGATATTAATAAATCTAGAGCACTTTCACATTATGTCAATGTAGTTAAAAGGATGAAAAGAAAATGTTTATCTT  
CCAGGA

>S\_Luhya-2\_3p14.3\_H1\_soloLTR

TTCTCTTTGGGAATGTGAGGCCTCTGAGCCCAAGCCAAGCCATCGCATCCCCTATGACATGCACGTACACGCCCAGA  
TGGCCTGAAGTAACTGAAGAATCACAAAAGAAGTGAATATGCCCTGCCCCACCTTAACTGATGACATTCCACCACAA  
AAGAAGTGAATATGGCCAGTCCCTTGCCTTAACTGATGACATTACCTTGTGAAAGTCCTTTTCTGGCTCATCCTGGC  
TCAAAAAGCACCCCCACTGAGCACCTTGCAGCCCCCGCTCCTACCCGCCAGAGAACAACCCCTTTGACTGTAAT  
TTTTCTTTACCTACCCAAATCCTATAAAACGGCCCCACCCCTTATCTCCCTTCGCTGACTCTCTTTTTCCGACTCAGCC  
CGCCTGCACCCAGGTGAAATAAACAGCCTTGTGCTCACACAAAGCCTGTTTGGTGGTCTCTTTCACACAGACGCGCA  
TGAAAGGGAAGACATACAAAACAAGGTAATAAGTAACTACGTTATATGTTTGATAATGGTGTATGTTAAGGGTGG  
GGAAAGAAGAAAGCAAAGAAGGATAAGAAATGGGAGGGGGCAATTCTAGAAAC

>S\_Luhya-2\_5p13.3\_K2\_soloLTR

TCCATCATATAAACAGAACTGTGGGAAAAGCAAGAGAGATCAGATTGTTACTGTGTCTGTGTAGAAAAGAAGTAGAC  
ATAGGAGACTCCATTTTTGTTATGTACTAAGAAAAATTCTTCTGCCTTGAGATTCTGTGACCTTACCCCCAACCCCGT  
GCTCTCTGAAACATGTGCTGTGTCAACTCAGAGTTGAATGGATTAAGGGCRGTGCAAGATGTGCTTTGTTAAACAGA  
TGCTTGAAGGCAGCATGCTCCTTAAGAGTCATCACCCTCCCTCATCTCAAGTACCCAGGGACACAAAAACTGCGGA  
AGGCYGCAGGGACCTCTGCCTAGGAAAGCCAGGTATTGTCCAAGTTTCATAGTCTGAAATATGGCCTCGTGGGAAG  
GGAAAGACCTGACTGTCCCCAGCCCGACACCCGTAAGGGTCTGTGCTGAGGAGGATTAGTATAAGAGGAAGGCAT  
GCCTCTTGAGTTGAGACAAGAGGAAGGCATCTGTCTCCTGCCTGTCCCTGGGCAATRGAATGTCTCGKTATAAAAC  
CCGATTGTATGCTCCATCTACTGAGATAGGGAAAAACYGCCTTAGGGCTGGAGGTGGGACCTGCGGGCAGCAATACT  
GCTTTGTAAAGCATTGAGATGTTTATGTGTATGCATATCTAAAAGCACAGCACTTAATCCTTTACATTGTCTATGAT  
GCAAAGACCTTTGTTACGTTGTTGTCTGCTGACCCTCTCCACATTGTCTTGTGACCCTGACACATCCCCCTCTTT  
GAGAAACACCCACGAATGATCAATAAATACTAAKGGAACTCAGAGGCTGGCGGGATCCTCCATATGCTGAACGCTGG  
TTCCCCGGATCCCCTTATTTCTTTCTCTATACTTTGTCTCTGTGTCTTTTTCTTTTCTTAAAGTCTCTCATTCCACCTT  
ACGAGAAACACCCACAGGTGTGGAGGGGCAACCCACCCCTACACAGAACCAATGACAAAAACCACATGATTATCTCA  
ATAGATGCAGAAAAGGCCTTCGACAAAATTCAATAGCCATTAATGCTAAAAACTCTCAATAAACTAGGTATCGATGG  
AACATATCTCAAAAATAATAAGCGTTATTTATGACAAAACYCACAGCTAATATCATACTGAATGTGCAAAAACCTGGAAG  
CATTCCCTTTGAAAACCTGGCAAAAGACAAGTATGCCCTCTCTACCCTATTCAACATAATGTTGTTAGTTCTGGCAA  
GGCAATGAGGCCAGAGAAAAGAAAATAAAGGGTATTTAATTAGGAAAAGAGGAAGTCAAATTTGCCCTGTTTGCAGAT  
GACATGATTGTATATTTAGAAAACCCCATTTGTCTCAGCCCAAAAATCTCCTTAAAGCTGATAAGCAACTTCAGCAAAAT  
CTCAGGATACAAAATCAATGTGCAAAAATCACAACTTCTTATAACATCAATAACAGACAAAACAGAGAGCCAAATCA  
TGAGTGAACCTCCATTACAATTGCTACAAAAGTGAATAAAGTACCTAGGAATCCAACCTTCCAAGGGATGTGAAGGAC  
CTCTTCAAGGAGAACTACAAACCACTGCTCAACAAAATAAAAAGAGGACACAAACAAATGGAAGAATATTCCATGCTC  
ATGGATAGGAAGAATCAATATTGTGAAAATGGCTATACAGGTCAAGGTAATTTATAGATTCAATGCCATCCCCATCA  
AGCTACCAATGACTTTCTTTCACAGAATTGGGAAAACCTACTTTAAAGTTCATATGGAACCAAAAAA
