# Supplementary material for: Variation in proviral content among human genomes mediated by LTR recombination
Source: PubMed Central journal article supplement (PMC6298018; doi:10.1186/s13100-018-0142-3), 2018-12-18
Supplement: 13100_2018_142_MOESM4_ESM.pdf [file 13100_2018_142_MOESM4_ESM.pdf]

**Additional file 4: Comparison of predictions of solo LTR and provirus from *f indsoloLTR* and *findprovirus* pipelines to PCR based genotypes for solo LTR (S) and provirus (P) polymorphisms**

|                                          |                                           |                           |                           |                         |                         |                        |                          |                         |
|------------------------------------------|-------------------------------------------|---------------------------|---------------------------|-------------------------|-------------------------|------------------------|--------------------------|-------------------------|
| 18q21.1_W2<br>(Ref. allele:<br>Solo LTR) | Individuals<br><i>findprovirus</i><br>PCR | S_Mala-2<br>S/S           | S_Mala-3<br>P<br>S/P      | S_Kapu-1<br>P<br>S/P    | S_Kapu-2<br>P<br>S/P    | S_Yadava-1<br>P<br>S/P | S_Yadava-2<br>P<br>P/P   | S_Relli-1<br>P<br>S/P   |
| 4q22.1_H8<br>(Ref. allele:<br>Solo LTR)  | Individuals<br><i>findprovirus</i><br>PCR | S_Madiga-2<br>P<br>P/P    | S_Kapu-1<br>P<br>S/P      | S_Kapu-2<br>P<br>S/P    | S_Brahmin-2<br>P<br>S/P | S_Mala-2<br>P<br>P/P   | S_Yadava-1<br>P<br>S/P   |                         |
| 5p15.31_H2<br>(Ref. allele:<br>Solo LTR) | Individuals<br><i>findprovirus</i><br>PCR | S_Madiga-2<br>P*<br>P     | S_Yadava-1<br>P*<br>P     | S_Brahmin-1<br>P        | S_Brahmin-2<br>P        | S_Mala-2<br>P*<br>P    | S_Kapu-1<br>P            |                         |
| 5p13.3_K2<br>(Ref. allele:<br>Provirus)  | Individuals<br><i>findsoloLTR</i><br>PCR  | S_Brahmin-1<br>S\$<br>S/P | S_Brahmin-2<br>S\$<br>S/P | S_Relli-1<br>S\$<br>S/S | S_Irula-2<br>S\$<br>S/P | S_Yadava-1<br>S/P      | S_Yadava-2<br>S\$<br>S/P | S_Luhya-2<br>S\$<br>S/P |
| 2q34_H4<br>(Ref. allele:<br>Provirus)    | Individuals<br><i>findsoloLTR</i><br>PCR  | S_Madiga-2<br>S<br>S/P    | S_Kapu-1<br>P/P           | S_Kapu-2<br>P/P         | S_Mala-2<br>P/P         | S_Mala-3<br>P/P        |                          |                         |
| 3p14.3_H1<br>(Ref. allele:<br>Provirus)  | Individuals<br><i>findsoloLTR</i><br>PCR  | S_Luhya-2<br>S<br>S/P     | S_Madiga-2<br>P/P         | S_Mala-2<br>P/P         | S_Mala-3<br>P/P         | S_Yadava-1<br>P/P      | S_Brahmin-1<br>P/P       | S_Kapu-1<br>P/P         |

Footnotes: 'S' denotes solo LTR and 'P' denotes Provirus. \*no of discordant reads identified were less than 4. \$ The Percentage Read Depth criteria in those individuals are between 51-60.
