# Supplementary material for: Variation in proviral content among human genomes mediated by LTR recombination
Source: PubMed Central journal article supplement (PMC6298018; doi:10.1186/s13100-018-0142-3), 2018-12-18
Supplement: 13100_2018_142_MOESM6_ESM.pdf [file 13100_2018_142_MOESM6_ESM.pdf]

Flanking seq TSD 5' LTR

Consensus\_HERV-H/1-8613 chr4\_91045770-91046171/1-402 AC226758.3\_c17895-11593/1-6303 AC210774.3\_7565-13867/1-6303

|                                |                                                                                                                                                              |      |
|--------------------------------|--------------------------------------------------------------------------------------------------------------------------------------------------------------|------|
| Consensus_HERV-H/1-8613        | CCGTGACTAGCCCTCCCCACCCTGCCCAACAATTTCTCTTTAAAAAGTTGGCTGGAGCTAAAGCA TAGTCAAAGTTAATGCTCCTTTTTCTTTATCTGACCTCTCCCAATCAGTTAGCATTAGACTCTTTTTCAATAACAACAAAACCC       | 1979 |
| chr4_91045770-91046171/1-402   | -----                                                                                                                                                        | 41   |
| AC226758.3_c17895-11593/1-6303 | CTGCAACTAGCCCTCCCCACCCTGCCCAACAATTTCTCTTTAAAAAGTTGGCTGGAGCTAAAGCA TAGTCAAAGTTAATGCTCCTTTTTCTTTAAACCAACCTCTCCCAATCAGTTAGCATGTAGGCTCTTTTTCAATAAT-AAAAACCA      | 1803 |
| AC210774.3_7565-13867/1-6303   | CTGCAACTAGCCCTCCCCACCCTGCCCAACAATTTCTCTTTAAAAAGTTGGCTGGAGCTAAAGCA TAGTCAAAGTTAATGCTCCTTTTTCTTTAAACCAACCTCTCCCAATCAGTTAGCATGTAGGCTCTTTTTCAATAAT-AAAAACCA      | 1803 |
| Consensus_HERV-H/1-8613        | GCCCAATTATGGCTCATTGGCAGCAACCCTGAGACGCTTTACAGCCCTTAGACCTAAAAAGGTCAAAAGGCCGTCTTATCCTCAATATACATTTTATTAACCAATCTGCTCCAAACATTAAATAAAATCCAAAAATTAATTCGGCCCTCAA      | 2134 |
| chr4_91045770-91046171/1-402   | -----                                                                                                                                                        | 41   |
| AC226758.3_c17895-11593/1-6303 | GCCCAATTATGGCTCATTGGCAGCAACCCTGAGACGCTTTACGGCCCTTAGCCCTAAAAAGGTCAAAAGGCCATCTTATTCATATATACATTTTATTAACCAATCTACTCCCAACATTAAATAAAATCCAAAAATTAATTCACCCCTCAA       | 1958 |
| AC210774.3_7565-13867/1-6303   | GCCCAATTATGGCTCATTGGCAGCAACCCTGAGACGCTTTACGGCCCTTAGCCCTAAAAAGGTCAAAAGGCCATCTTATTCATATATACATTTTATTAACCAATCTACTCCCAACATTAAATAAAATCCAAAAATTAATTCACCCCTCAA       | 1958 |
| Consensus_HERV-H/1-8613        | ACCCCAACAAGGATTTAAATTAACCTCAACCTTCAAGGTGTACAATAAAGAAA-----AAGTTGCAATCCTTGCCCTCCACTGTGAGACAAACCCAGACACATCTCCAGCACAAAGAACTTCGAAATGCC                           | 2262 |
| chr4_91045770-91046171/1-402   | -----                                                                                                                                                        | 41   |
| AC226758.3_c17895-11593/1-6303 | ACCCCAACAATGGAATTTAAATTAACCTCAACCTTCAAGTTGTATAATAGTAGAGTAGAGGCAGCCAGTAGCAAGGTAATTTCTGAGTTGCAATCCTTGCCCTCCACTGTGAGACAAACCCAGCCACATCTCCAGCACAAAGAACTTCGAAATGCC | 2113 |
| AC210774.3_7565-13867/1-6303   | ACCCCAACAATGGAATTTAAATTAACCTCAACCTTCAAGTTGTATAATAGTAGAGTAGAGGCAGCCAGTAGCAAGGTAATTTCTGAGTTGCAATCCTTGCCCTCCACTGTGAGACAAACCCAGCCACATCTCCAGCACAAAGAACTTCGAAATGCC | 2113 |
| Consensus_HERV-H/1-8613        | TCAACCTCAGGTGCCAGGGGTTCTCCAGAACCTTCTCCCCAGGAGCTTGTCTACAAGTGCAGAAATCTGGCCACTGGCCAAAGGAAATGCCACAGACAGGATTCCTCTTAAGCTGTATCCCATCTCTGTGGGACCCCACTAAAAATCAGACT     | 2417 |
| chr4_91045770-91046171/1-402   | -----                                                                                                                                                        | 41   |
| AC226758.3_c17895-11593/1-6303 | TAAGCCACAGTGGTGAAGGCTTCTCTCAGGACCTCTCCCCAGGATCTTGTCTTCAAGTGCAGAAATCTGGCCACAGGCCAAAGGAAATGCTGACGCTGGGATTCCTCTTAAGCTGTGTCCAGCTGTGTGGGTCCCACTGGAAATTCAACT       | 2268 |
| AC210774.3_7565-13867/1-6303   | TAAGCCACAGTGGTGAAGGCTTCTCTCAGGACCTCTCCCCAGGATCTTGTCTTCAAGTGCAGAAATCTGGCCACAGGCCAAAGGAAATGCTGACGCTGGGATTCCTCTTAAGCTGTGTCCAGCTGTGTGGGTCCCACTGGAAATTCAACT       | 2268 |
| Consensus_HERV-H/1-8613        | GTTCAACTCACCTGGCAGCCACTCCAGAGCCCTTGGAACTAGCCCAAGGCTCTGACTGACCCCTTCTGAGACTTTCTTGGCTTAGCAGCTGAAAGACTGACACTGCCAGATCGCCCTGGAAAGCCATCAGGACCATCACAGATGCTCCAGGT     | 2572 |
| chr4_91045770-91046171/1-402   | -----                                                                                                                                                        | 41   |
| AC226758.3_c17895-11593/1-6303 | GTCCAA-----CTAGCCCAAGG--CTCTGACTTACTTCTCCAGATCTTCTCAGCTTAGTGGCTGAAAGACTGGCGCTGCCTGTGTGCCCTGGAAAGCCCTCTGGACCATCACAGATGCTTTGGGT                                | 2386 |
| AC210774.3_7565-13867/1-6303   | GTCCAA-----CTAGCCCAAGG--CTCTGACTTACTTCTCCAGATCTTCTCAGCTTAGTGGCTGAAAGACTGGCGCTGCCTGTGTGCCCTGGAAAGCCCTCTGGACCATCACAGATGCTTTGGGT                                | 2386 |
| Consensus_HERV-H/1-8613        | AACCTCACAGTAGAGGGTAAGTCTGTCCCTTCTTAATCAATATGGAGGCTACCCACTGCACATTAACCTCTTTTCAAGGCCCTGTTTCTTTGCTCCATAACTGTTGTGGGTAATGACGCCAGGCTTTAAACCTCTTAAACTCCCCAAC         | 2727 |
| chr4_91045770-91046171/1-402   | -----                                                                                                                                                        | 41   |
| AC226758.3_c17895-11593/1-6303 | AACCTTACAGTGGAGGGTAAGTCCATCCCCCTCTTAATCAATACAGAGGCTACCCACTCCACATTAACCTCTTTTCAAGGCCCTGTTTCTTTGCTCCATAACTGTTGTGGGTAATGATGGCCAGGCTTTAAACCTCTTAAACTCCCCAAC       | 2541 |
| AC210774.3_7565-13867/1-6303   | AACCTTACAGTGGAGGGTAAGTCCATCCCCCTCTTAATCAATACAGAGGCTACCCACTCCACATTAACCTCTTTTCAAGGCCCTGTTTCTTTGCTCCATAACTGTTGTGGGTAATGATGGCCAGGCTTTAAACCTCTTAAACTCCCCAAC       | 2541 |
| Consensus_HERV-H/1-8613        | TCAGTACCAACTTAGACAATACTCTTTTAAAGCACTCTTTTTAGTTATCCCCACTGCCCAGTCCCTTATGAGGCCGAGACACTTCAACTAAATTAATCTGCTTCCCTGACTATTCTGGACTACAGTACATCTCATTTGCTGCCCTTCTTCCC     | 2882 |
| chr4_91045770-91046171/1-402   | -----                                                                                                                                                        | 41   |
| AC226758.3_c17895-11593/1-6303 | CTPGTGCCAACTTGGACAGTATCTTTTATGCACTCTTTTTAGTTATCCCCACTGCCCAGTCCCTTATTAGCCAAAGTATTTTAACTAAATTAATCTGCTTCCCTGACTATTCTAGGCTACAGCCACCTCATTTGCCACCAATTTCCC          | 2696 |
| AC210774.3_7565-13867/1-6303   | CTPGTGCCAACTTGGACAGTATCTTTTATGCACTCTTTTTAGTTATCCCCACTGCCCAGTCCCTTATTAGCCAAAGTATTTTAACTAAATTAATCTGCTTCCCTGACTATTCTAGGCTACAGCCACCTCATTTGCCACCAATTTCCC          | 2696 |
| Consensus_HERV-H/1-8613        | AATCCAAAGCCTCTTTGCACTCT--CTTGTATCCCCAACCTTAAACCCACAAGTATAAGATACCTCTATTCCCTCCTTGGTACCAATCATGACCCCTTACCATCTCATTAAAACTAAATCACTCTTACCCGGCTCAATGCCAAGATCCCCAT     | 3034 |
| chr4_91045770-91046171/1-402   | -----                                                                                                                                                        | 41   |
| AC226758.3_c17895-11593/1-6303 | AGTTCAAAGCCTCTTCACTCTCTCCCCCTTGTATCTCCCCACTTAAATCCACAAGTATAGGACATCTCTACTCCATCTTGGGACCAATCATGACCCCTTACCATCCCATTTAAAACTAAATCACTCTTACCCACTCAACGCCAATATCCCCAT    | 2851 |
| AC210774.3_7565-13867/1-6303   | AGTTCAAAGCCTCTTCACTCTCTCCCCCTTGTATCTCCCCACTTAAATCCACAAGTATAGGACATCTCTACTCCATCTTGGGACCAATCATGACCCCTTACCATCCCATTTAAAACTAAATCACTCTTACCCACTCAACGCCAATATCCCCAT    | 2851 |
| Consensus_HERV-H/1-8613        | CCCACAGCATGCTTTAAAGGATTAACCACTGTTATCACTCGCTGCTAGAGCATGGCCTTTTAAAGCCTATAAACTCTCCTTACAAATCCCCCATTTTACCTGTCTAGAACAGACAAGCCTTACAG---GTTACAGGATCTGTGTCTTATCA      | 3185 |
| chr4_91045770-91046171/1-402   | -----                                                                                                                                                        | 41   |
| AC226758.3_c17895-11593/1-6303 | CCCACAGCAGGCTGTAAAAGGAATAAAGCCTGTTATCACTTGCCTGTACAGCATGGCCTTTTAAAGCCTATAAACTCTCCTTAC--ATTCCCCATTTTACCTGTCCAAAAACAGACAAGTCTTACAGGTTAGTTACAGGATCTGCACCTTATCA   | 3005 |
| AC210774.3_7565-13867/1-6303   | CCCACAGCAGGCTGTAAAAGGAATAAAGCCTGTTATCACTTGCCTGTACAGCATGGCCTTTTAAAGCCTATAAACTCTCCTTAC--ATTCCCCATTTTACCTGTCCAAAAACAGACAAGTCTTACAGGTTAGTTACAGGATCTGCACCTTATCA   | 3005 |
| Consensus_HERV-H/1-8613        | ATGAAATGTTTTCCCTATCCACCCGTGGTCTGAAACCAATATCTCTCTTACCTCAATACCTC-----CTCTACAACCAATATTCTGTTCTAGATCTCAAAATGCTTTCTTTACTATCCCTTTACACCTTCAACCCAGCCTC                | 3329 |
| chr4_91045770-91046171/1-402   | -----                                                                                                                                                        | 41   |
| AC226758.3_c17895-11593/1-6303 | ACCAAAATGTTTTGCTTATCCACCCATGGTCCAAAACCAATATCTCTCTTATCTCTGATACCTCCCCGACAAACCTCCAAACCCATTTATCTGTTCTGGATCTCAAAATGCTTTCTTTACTATCTCTTTGACGCTTCACTCCAGCCTC         | 3160 |
| AC210774.3_7565-13867/1-6303   | ACCAAAATGTTTTGCTTATCCACCCATGGTCCAAAACCAATATCTCTCTTATCTCTGATACCTCCCCGACAAACCTCCAAACCCATTTATCTGTTCTGGATCTCAAAATGCTTTCTTTACTATCTCTTTGACGCTTCACTCCAGCCTC         | 3160 |
| Consensus_HERV-H/1-8613        | CTTCTGTTTTCACTGGACTGACCCGACACCCATCAGTCCCAAGCCTTACCTGGGCTGTAAATGCTGCAAGGTTTCAAGGGCAGCCCTTATTATTTCAGCCAAAGCTTTTCTCATGATTTACTTTTCCACCCCTCCACTTCTCACTTATT        | 3484 |
| chr4_91045770-91046171/1-402   | -----                                                                                                                                                        | 41   |
| AC226758.3_c17895-11593/1-6303 | CTTCTCACTTTCACCTGGACTGACCCGATACCCATCAGCCCTCAGCAAAATCCTGGGTTGATCTGCCCAAGGCTTCAAGGACAGCCCTTACTTCTAGCT                                                          | 3262 |
| AC210774.3_7565-13867/1-6303   | CTTCTCACTTTCACCTGGACTGACCCGATACCCATCAGCCCTCAGCAAAATCCTGGGTTGATCTGCCCAAGGCTTCAAGGACAGCCCTTACTTCTAGCT                                                          | 3262 |
| Consensus_HERV-H/1-8613        | CAATATATGGTGTGTTCTTCTTTGTAGCCCTCCTTTGAATCTTCTCAACAAGACACACTTCTGCTCCTTTCAGCATTTATTCCTCAAAGGATATCCCCCTCCAAAGCTCAAATGTCTTCTCCAATCCGTTACCTACCTTGGCATAAATCTTCAAT  | 3639 |
| chr4_91045770-91046171/1-402   | -----                                                                                                                                                        | 41   |
| AC226758.3_c17895-11593/1-6303 | -----                                                                                                                                                        | 3312 |
| AC210774.3_7565-13867/1-6303   | -----                                                                                                                                                        | 3312 |

|                                |                                                                                                                                                                  |      |
|--------------------------------|------------------------------------------------------------------------------------------------------------------------------------------------------------------|------|
| Consensus_HERV-H/1-8613        | AAAAACACACGTGCCCTCCCTGCTGATA GTGTCTGACTGATCTCTCAAAACCCCAACCCCTTTCTACAAAACAACAATCTTTTCCATCCTAGGCATGGTTGGATACCTTTTCTGTAGGATACC TGGTTTTGCCATCCTAACAAAACCATTTATATAA  | 3794 |
| chr4_91045770-91046171/1-402   | -----                                                                                                                                                            | 41   |
| AC226758.3_c17895-11593/1-6303 | GAAAAACACATGTGCTCTGCCCTCCCTGATCGTGTCTGACTGATATCTCAAAACCCCAATACTTTCTACAAAACAACAATCT- TTTCTTCTAGTCAATGGTTAGGTACTTCCACCTTTGGATACCTAGTTTTACCATCCTAACAAAACCATTTATATAA | 3466 |
| AC210774.3_7565-13867/1-6303   | GAAAAACACATGTGCTCTGCCCTCCCTGATCGTGTCTGACTGATATCTCAAAACCCCAATACTTTCTACAAAACAACAATCT- TTTCTTCTAGTCAATGGTTAGGTACTTCCACCTTTGGATACCTAGTTTTACCATCCTAACAAAACCATTTATATAA | 3466 |
| Consensus_HERV-H/1-8613        | ACTCACAAAAGGAAACCTAGCTTGAACCCCATAGATCCTAAATCGTTTCCCACCTCTCTTTCCATTCTTTGAAAGACAGCTTTAGAGACTGCTCCACTTAGCTCTCCCTGACTCATCCCAACCTTTTCATTACACACAGCTGAAAGTGCAGGGCT      | 3949 |
| chr4_91045770-91046171/1-402   | -----                                                                                                                                                            | 41   |
| AC226758.3_c17895-11593/1-6303 | ACTCACAAAAGGAAACCTAGCTTGAACCCCATAGATCCTAAATCCTTT- CCCACTCCTTTTTCTGTTCCCTTGAAGACAGCTTTAGAGACTGCCCCACACTATCTCTCCCTGACTCATCCCAACCCCTTTTCATTACACACAGCCAAAGTACAGGACT  | 3620 |
| AC210774.3_7565-13867/1-6303   | ACTCACAAAAGGAAACCTAGCTTGAACCCCATAGATCCTAAATCCTTT- CCCACTCCTTTTTCTGTTCCCTTGAAGACAGCTTTAGAGACTGCCCCACACTATCTCTCCCTGACTCATCCCAACCCCTTTTCATTACACACAGCCAAAGTACAGGACT  | 3620 |
| Consensus_HERV-H/1-8613        | GTGCACTCAGAAATCTTACACAAAGGACCGGGATCGCATCCGTAGCCCTTTTTGTCCAAACAACCTGACCTTACTGTTTTAGGCTGGCCATCATGTCTCCATGCAAGCTGTGCTGCCACCCCTAATACTTTTAGAGGCCCTCAAATCACAACTAT      | 4104 |
| chr4_91045770-91046171/1-402   | -----                                                                                                                                                            | 41   |
| AC226758.3_c17895-11593/1-6303 | GTGCACTCAGAAATCTTACACAAAGGACCTGGGACTGCAACCCGTAGCCCTTTTTGTCCAAACAACCTGACCTTACTGTTTTAGGCTGGCCATCATGTCTCCGTGACAGGCTGCGCCATCCTAATACTTTAGAGGCCCTCAAATCACAACTAT        | 3775 |
| AC210774.3_7565-13867/1-6303   | GTGCACTCAGAAATCTTACACAAAGGACCTGGGACTGCAACCCGTAGCCCTTTTTGTCCAAACAACCTGACCTTACTGTTTTAGGCTGGCCATCATGTCTCCGTGACAGGCTGCGCCATCCTAATACTTTAGAGGCCCTCAAATCACAACTAT        | 3775 |
| Consensus_HERV-H/1-8613        | GCTCAACTCATTCTCTACAGCTCTCATAAATTTCCAAAATCTATTTTTCTTCTCACACCTGACACATATACTTTCTGCTCCCGGCTCCTTCAGATATACTCACTC- -CATTTATTCTCCCAAAATACCATTAATCTTGGCCCTGGAATTCATATCC    | 4257 |
| chr4_91045770-91046171/1-402   | -----                                                                                                                                                            | 41   |
| AC226758.3_c17895-11593/1-6303 | GCTCAACTCATTCTCTACAGCTCTCATAAATTTCCAAAATTTATTTTTCTTCTCACATCTGACACATATACTTTCTGCTCCCGGCTCCTTCAGATATACTCACTC-----GGCCGGACTTCATATCC                                  | 3923 |
| AC210774.3_7565-13867/1-6303   | GCTCAACTCATTCTCTACAGCTCTCATAAATTTCCAAAATTTATTTTTCTTCTCACATCTGACACATATACTTTCTGCTCCCGGCTCCTTCAGATATACTCACTC-----GGCCGGACTTCATATCC                                  | 3923 |
| Consensus_HERV-H/1-8613        | GGCCTCCACATTAATCTGGATACCATACCTGACCCCTCATGACTGCATCTCTGATCCACTGACGTTACCCCCATTTCCCAACATTTCTTTCTGCCCCGTTTCTACCCCTGATCACACTTGGTTTATGATGGCAGTTCCACCAGGCCATAATC         | 4412 |
| chr4_91045770-91046171/1-402   | -----                                                                                                                                                            | 41   |
| AC226758.3_c17895-11593/1-6303 | GGCCTCCGACATTAATCTGGATACCACACTGACCCCAAGACTGATATCTCTGATCCACTGACATTTGCCCAATTTCCCAATATTTCTTTCTTCTGTTCTCACCCCTGATTACATTTGGTTTACTGATGGCAGTTCCACCAGGCCATAATC           | 4078 |
| AC210774.3_7565-13867/1-6303   | GGCCTCCGACATTAATCTGGATACCACACTGACCCCAAGACTGATATCTCTGATCCACTGACATTTGCCCAATTTCCCAATATTTCTTTCTTCTGTTCTCACCCCTGATTACATTTGGTTTACTGATGGCAGTTCCACCAGGCCATAATC           | 4078 |
| Consensus_HERV-H/1-8613        | GCCACTCACAGCAAAAGCCAGGATATGCTA-----TGAACTAGTTGCCCTTAATCAAGCCCTCACTCTTGCAAAAGGACTACGTGTCAATATCT                                                                   | 4501 |
| chr4_91045770-91046171/1-402   | -----                                                                                                                                                            | 41   |
| AC226758.3_c17895-11593/1-6303 | ACCACCTCACAGCAAAAGCCAGGCTATGCTATATAGTATCTTCCACATCTATAAATGAGGCTACTGCTCTGCCCGCTCCACTACCTCTCAGCAAGCTGAACCTATTGCCCTTAACCTGGGACCTCACTCTTGCAAAAGGACTACACATCAATACTT     | 4233 |
| AC210774.3_7565-13867/1-6303   | ACCACCTCACAGCAAAAGCCAGGCTATGCTATATAGTATCTTCCACATCTATAAATGAGGCTACTGCTCTGCCCGCTCCACTACCTCTCAGCAAGCTGAACCTATTGCCCTTAACCTGGGACCTCACTCTTGCAAAAGGACTACACATCAATACTT     | 4233 |
| Consensus_HERV-H/1-8613        | ATACTGATCTAAATATGCCCTTTCAATTTCTGACCCCAATGCGGTATATGGGCTGAAAGAGGTTTCCCTACTACAC- AAGTGTCCCTCCATCATTAATGCCCTCTTTAA- GAAAACTCTGCTCAAGGCTGCTTTACTTCCAAAAGGCTGGGGT      | 4654 |
| chr4_91045770-91046171/1-402   | -----                                                                                                                                                            | 41   |
| AC226758.3_c17895-11593/1-6303 | ATACTGATCTAAATATGCCCTTTCAATTTCTGACCCCAATGCGGTATATGGGCTGAAAGAGGTTTCCCTACTACACAAAAGGCTCCCTCCATCATTAATGCCCTCTTTAAATGAAACCTTTCTCAAGGCTCTTTGCTTCCAAAAGGCTGGAGT        | 4388 |
| AC210774.3_7565-13867/1-6303   | ATACTGATCTAAATATGCCCTTTCAATTTCTGACCCCAATGCGGTATATGGGCTGAAAGAGGTTTCCCTACTACACAAAAGGCTCCCTCCATCATTAATGCCCTCTTTAAATGAAACCTTTCTCAAGGCTCTTTGCTTCCAAAAGGCTGGAGT        | 4388 |
| Consensus_HERV-H/1-8613        | CAATCACTGCAAGGGGCATCAAAGAATTAGATCCCATTGCTCTAGGCAATGCTTATGCTGATAAAGGTGGCTAGACAAGCAGCTAGCTCTCCAACTTTTGTCCCTCATGGCCAGTTTTTCTCTTCCATCCG- -TCACTCCCACCTACTCC          | 4805 |
| chr4_91045770-91046171/1-402   | -----                                                                                                                                                            | 41   |
| AC226758.3_c17895-11593/1-6303 | CAATCACTGCAAGGGGCATCAAAGGCGTATATCCCATTGCTCTAGGCAATGCTTATGCTGATAAAGGTGGCTAGACAAGCAGCTAAACATTCCACTTGTCCCTCAGGCCAGTTTTTCTCTTCTCATCCATCGTTCACCTACTCC                 | 4543 |
| AC210774.3_7565-13867/1-6303   | CAATCACTGCAAGGGGCATCAAAGGCGTATATCCCATTGCTCTAGGCAATGCTTATGCTGATAAAGGTGGCTAGACAAGCAGCTAAACATTCCACTTGTCCCTCAGGCCAGTTTTTCTCTTCTCATCCATCGTTCACCTACTCC                 | 4543 |
| Consensus_HERV-H/1-8613        | ACAGCTGAAACTCCACCTATCAAGCTCTTCCCCCGCAAGGTAAATGGTTCTTAGACCAAGGAAAAATCTCCTTCCAGCCCTCACAGGCCATTCATTTCTGTGCTCATTTCAAACTTTTCCATGTAAGTTACAAAGCCACTAGCCTGTCTCTT         | 4960 |
| chr4_91045770-91046171/1-402   | -----                                                                                                                                                            | 41   |
| AC226758.3_c17895-11593/1-6303 | CCAGCTGAAACTGCCACCTATCAATCTCTTCCCAACAAGGCAAAATGGTTCTTGGACCAAGGAAAAATCTCCTTCCGGCTCACAGGCCATTTGCAATGTTGCTGCTATTTCATAAACTCTTCCATGTAAGTTACAAAGCCACTAGCCATCTCTT       | 4698 |
| AC210774.3_7565-13867/1-6303   | CCAGCTGAAACTGCCACCTATCAATCTCTTCCCAACAAGGCAAAATGGTTCTTGGACCAAGGAAAAATCTCCTTCCGGCTCACAGGCCATTTGCAATGTTGCTGCTATTTCATAAACTCTTCCATGTAAGTTACAAAGCCACTAGCCATCTCTT       | 4698 |
| Consensus_HERV-H/1-8613        | AGGACCTCTCATTTCCTTTCCATCAATGAAAATCTATCCCTCAAGGAGATCACTTCTCAGTGTCCATCTGCTATTCCTGCTACCCCTCAGGGAATGTTTCAAG- CCTCCTCCCCTTCTCAACATAAAGCTCGGGATTTGCCCTGCCAAGACTGG      | 5114 |
| chr4_91045770-91046171/1-402   | -----                                                                                                                                                            | 41   |
| AC226758.3_c17895-11593/1-6303 | AGAACCTCTCATTTCCTTTCCATCGTGGAAAATCTATCCCTTAAAGAAAATCACTTCTCAGTATTTCCATCTGCTATTTCTACTACTCTCAGGAAATTTCTCAGGCCCTCCCTTCCCTACACATCAAGCTTGGGGATTTGCTTCTGCCAAGACTGG     | 4853 |
| AC210774.3_7565-13867/1-6303   | AGAACCTCTCATTTCCTTTCCATCGTGGAAAATCTATCCCTTAAAGAAAATCACTTCTCAGTATTTCCATCTGCTATTTCTACTACTCTCAGGAAATTTCTCAGGCCCTCCCTTCCCTACACATCAAGCTTGGGGATTTGCTTCTGCCAAGACTGG     | 4853 |
| Consensus_HERV-H/1-8613        | CAAAATGACTTTACTCACAATGCCCCGAGTCAAGAAACAAAATATCTTCTAGCTGCGGTAGACACTTTCACTGGGTGGGTAGAGGCCCTTTCCATAGAGTCTGAGAAAGCCACCGCGGTCAATTTCTCCCTCTGCTCAGACATAATCCTTGGTT       | 5269 |
| chr4_91045770-91046171/1-402   | -----                                                                                                                                                            | 41   |
| AC226758.3_c17895-11593/1-6303 | CAAAATGACTTTACTCACAATGCCCCGAGTCAAGAAACAAAATACCTCTTGGTCTGGGTAGACACTTTCTACTGGAAGGGTAGAGACTTTCTTGCAGGGTCTGAGAAAGCCACCTGCATCATTTATCCCTCTGCTCAGACATAA                 | 4998 |
| AC210774.3_7565-13867/1-6303   | CAAAATGACTTTACTCACAATGCCCCGAGTCAAGAAACAAAATACCTCTTGGTCTGGGTAGACACTTTCTACTGGAAGGGTAGAGACTTTCTTGCAGGGTCTGAGAAAGCCACCTGCATCATTTATCCCTCTGCTCAGACATAA                 | 4998 |
| Consensus_HERV-H/1-8613        | TGGCTTCCCTCTCTATACAGCTGATTAACGGACCGCTTTACTAGTAAATCACCCAAAGCAATTTCTCAGGCTCTTGGTATTCTAGTGAACTTCAATATCCCTTAACTCCTCAATCTTCAAGAAAGGTAACCAAGCAATAGGCTTTTTAA            | 5424 |
| chr4_91045770-91046171/1-402   | -----                                                                                                                                                            | 41   |
| AC226758.3_c17895-11593/1-6303 | -----TTCCCACTCTATACAGCTAATAACAGACCGGCCCTTACTATTCAAATCACCCAAAGCAATTTCTCAGGCTCTTGGTATTCTAGTAACTTCAATATCCCTTAACTCCTCAATCTTCAAGAAAGGTAACCAAGCAATAGGCTTTTTAA          | 5148 |
| AC210774.3_7565-13867/1-6303   | -----TTCCCACTCTATACAGCTAATAACAGACCGGCCCTTACTATTCAAATCACCCAAAGCAATTTCTCAGGCTCTTGGTATTCTAGTAACTTCAATATCCCTTAACTCCTCAATCTTCAAGAAAGGTAACCAAGCAATAGGCTTTTTAA          | 5148 |

|                                |                                                                                                                                                                |      |
|--------------------------------|----------------------------------------------------------------------------------------------------------------------------------------------------------------|------|
| Consensus_HERV-H/1-8613        | AGCACACCTCACCAAGCTCAGCCTCCAACTTAAAAAGGATTGGACAGTACTTTTACCCTCGCCCTTCAGAAATTAGAACCTGTCTCGAGATGCTACAGGGTACAGTCCAATTGAACTTTTATATGGACGCCACTTCTTGCTTGGTCCCAAC        | 5579 |
| chr4_91045770-91046171/1-402   | -----                                                                                                                                                          | 41   |
| AC226758.3_c17895-11593/1-6303 | AAACACACCTCACCAAGCTCAGCCACAAACTTAAAAAGGACTGGACAATACTTTTACCCTTTCCCTTCAGAAATTGGGCTGTCTCTAGAAATGCTACAGGGTACAGCCCAATTGAGCTCCTGTATGGACACTCCTTTTTTACTAGGCCCCAGC      | 5303 |
| AC210774.3_7565-13867/1-6303   | AAACACACCTCACCAAGCTCAGCCACAAACTTAAAAAGGACTGGACAATACTTTTACCCTTTCCCTTCAGAAATTGGGCTGTCTCTAGAAATGCTACAGGGTACAGCCCAATTGAGCTCCTGTATGGACACTCCTTTTTTACTAGGCCCCAGC      | 5303 |
| Consensus_HERV-H/1-8613        | CTCATCCCAGACACCAGCCCTTAGGCGACTATCTCCAGTCCCTCAACAGGCTAGGCAGGAAAGTACCAGGTGCTAATCTTCTCTTGCTACTCCAGATCCCCAGCCATATGAAGACACTCTAGCTGGACGATCAGTTCCTGTTAAGAATCT         | 5734 |
| chr4_91045770-91046171/1-402   | -----                                                                                                                                                          | 41   |
| AC226758.3_c17895-11593/1-6303 | CTCATCCCAGACACCAGCC                                                                                                                                            | 5322 |
| AC210774.3_7565-13867/1-6303   | CTCATCCCAGACACCAGCC                                                                                                                                            | 5322 |
| Consensus_HERV-H/1-8613        | GACCCCTCAAACTCTACAACCTCGATGGACTGGACCCCTACTTACTCATCTATAGTACCCTGACTGCCGTCCGCTCGAGGATCCCTCCCCACTGGGTTCCCAATTCCAGAAATAAAGCTGTGTCCATTGGACAGCCAGCCCTAATCCCCTCTTCCCT  | 5889 |
| chr4_91045770-91046171/1-402   | -----                                                                                                                                                          | 41   |
| AC226758.3_c17895-11593/1-6303 | -----                                                                                                                                                          | 5322 |
| AC210774.3_7565-13867/1-6303   | -----                                                                                                                                                          | 5322 |
| Consensus_HERV-H/1-8613        | CTTGCAAGTCGCAATTACTCTCCCCCTACTCCCTTAACTCACCTCGTATTTTGAAGAACAGTAATAACCCCTTAGAGCCATAATACATCCCTTCATTCTATTAAGGTCTGTTTGTCTTACCCTACTTTTTGCAACAGGGCTTTATGAACCTCACCC   | 6044 |
| chr4_91045770-91046171/1-402   | -----                                                                                                                                                          | 41   |
| AC226758.3_c17895-11593/1-6303 | -----                                                                                                                                                          | 5322 |
| AC210774.3_7565-13867/1-6303   | -----                                                                                                                                                          | 5322 |
| Consensus_HERV-H/1-8613        | CCACCCTTAGGCTGAGCCCAAAAAATCTTGTCACTCCCTACTATTTTTGTGTCCAGTCACTACTCCTATTCCTGTCTCTCAACTACTTATAAATGCCGTACTCTT-----GTTTACACTGCTGGTTTACACTGTTTCTTCAAGCCATCA          | 6186 |
| chr4_91045770-91046171/1-402   | -----                                                                                                                                                          | 41   |
| AC226758.3_c17895-11593/1-6303 | ---CAACTTGGACAGTGCCCAAAAA--CCTGTCACTCCCTACTATTTTTGTGTCTAGTCACTACTCCCAATTCACCGTCTCAATTACTCTATAAATGCCGTACTCTTGGTTTACACTGCTGGTTTACACTGCTGGTTTCACTGTTTCTCAAGCCATCA | 5473 |
| AC210774.3_7565-13867/1-6303   | ---CAACTTGGACAGTGCCCAAAAA--CCTGTCACTCCCTACTATTTTTGTGTCTAGTCACTACTCCCAATTCACCGTCTCAATTACTCTATAAATGCCGTACTCTTGGTTTACACTGCTGGTTTACACTGCTGGTTTCACTGTTTCTCAAGCCATCA | 5473 |
| Consensus_HERV-H/1-8613        | CAGCTGATATCTCTTGGTGCTATCCCCAACCCGCCACTCTTAACTCCCTCTTAGAGTGGGTAGATGATCTTTGCTGCCAGGGCACCCCTCCAACTCTCCACCCTGATGAAATTCTATTCCTTTACTTTTATACTCTCTCTTATTCTATTCCCAATT   | 6341 |
| chr4_91045770-91046171/1-402   | -----                                                                                                                                                          | 41   |
| AC226758.3_c17895-11593/1-6303 | CAGCTGATATCTCTTGGTGCTAACCCCAAGACTGCCACTCTTAACTCCCTCTTAAAGTAAATAATCTTTGCTGGCAGGGC-----GTAAATAATCTTTGCTGGCAGGGC                                                  | 5522 |
| AC210774.3_7565-13867/1-6303   | CAGCTGATATCTCTTGGTGCTAACCCCAAGACTGCCACTCTTAACTCCCTCTTAAAGTAAATAATCTTTGCTGGCAGGGC-----GTAAATAATCTTTGCTGGCAGGGC                                                  | 5522 |
| Consensus_HERV-H/1-8613        | CTTATGCCACCTTTTGCTCTCCCCAGCTATCTCCACCACACTATCAACCTTACCCATTCCTCTCTAGCTGCTTAACTCCCTCCTTAGTGAAACAAGTGTGGCTTTGCAATTTCCCTTTCTTCCAAGTCCCTCACTAGCTGTCCCTGCCCTACAGA    | 6496 |
| chr4_91045770-91046171/1-402   | -----                                                                                                                                                          | 41   |
| AC226758.3_c17895-11593/1-6303 | -----                                                                                                                                                          | 5522 |
| AC210774.3_7565-13867/1-6303   | -----                                                                                                                                                          | 5522 |
| Consensus_HERV-H/1-8613        | CAGACTGGGCTACATCTCCCTGTCTCCTTACACCTCTGAACCTCCTTAAACAGCCCTCACCTTTTACCCCTCCTAAGGAACCTCATTTACTTTCTAGACAGGTCCAGCAAGAATTCCCAAGACATTTCACATCAGCAAGCTGCCGCCCTCCTCCGCAT | 6651 |
| chr4_91045770-91046171/1-402   | -----                                                                                                                                                          | 41   |
| AC226758.3_c17895-11593/1-6303 | -----                                                                                                                                                          | 5522 |
| AC210774.3_7565-13867/1-6303   | -----                                                                                                                                                          | 5522 |
| Consensus_HERV-H/1-8613        | TATTTAAAAAACCTTTCTCCCTTATAATTAACCTACTCCCCCTATATTGGACCTCTCAACACAAAATATTATTCTGTTGCTGCTCCCTTATGTAATCTCTTGGCAAGAACCACGGAAATCCCTTAGGTAATTTTCACTTCTTGAATGTTCT        | 6806 |
| chr4_91045770-91046171/1-402   | -----                                                                                                                                                          | 41   |
| AC226758.3_c17895-11593/1-6303 | -----                                                                                                                                                          | 5522 |
| AC210774.3_7565-13867/1-6303   | -----                                                                                                                                                          | 5522 |
| Consensus_HERV-H/1-8613        | CTTTACTCTTTACTCCAAAGCCCAACTACACACTACCTGAAACAAATTGGAGCCCTTCCAGCTCCATATTACAGACAGCCCTCTGTCAATCTGACAAACTCAAAAAATTACCACTAAATGTTGCTTGGAGACACTTACCCGTATTTCAC          | 6961 |
| chr4_91045770-91046171/1-402   | -----                                                                                                                                                          | 41   |
| AC226758.3_c17895-11593/1-6303 | -----                                                                                                                                                          | 5522 |
| AC210774.3_7565-13867/1-6303   | -----                                                                                                                                                          | 5522 |
| Consensus_HERV-H/1-8613        | TCCATCCTTGGCTACCTTCCCTTGTCTACTCAGACTCTCCCTCCAGGCCCTCTTCTGTTTACTTATACCCAGCCCCAAAAATAACAGTGAAGGTTGCTCATAGATAATCAACGTTTTCTCGTACATCTAGAAAATTGAACATCCTCCTCTATG      | 7116 |
| chr4_91045770-91046171/1-402   | -----                                                                                                                                                          | 41   |
| AC226758.3_c17895-11593/1-6303 | -----                                                                                                                                                          | 5522 |
| AC210774.3_7565-13867/1-6303   | -----                                                                                                                                                          | 5522 |
| Consensus_HERV-H/1-8613        | CAGTTACCCCACTCAGTCCCAATTAACAACCTCGACAGCTGCGCCCTAGCTGGATCCCTAGGAGTCTGGGTAACAACACCCCTTTCAGCACTCCCTTTTCACTTTTTTACTTTTACTCTCCAGTTTTCCTCACACAAGGCTCTTCTTCTCTG       | 7271 |
| chr4_91045770-91046171/1-402   | -----                                                                                                                                                          | 41   |
| AC226758.3_c17895-11593/1-6303 | -----                                                                                                                                                          | 5522 |
| AC210774.3_7565-13867/1-6303   | -----                                                                                                                                                          | 5522 |

|                                                                                                                           |                                                                                                                                                                                                                                                                                                                                                                                                                                                                                                                                                                                                                              |                             |
|---------------------------------------------------------------------------------------------------------------------------|------------------------------------------------------------------------------------------------------------------------------------------------------------------------------------------------------------------------------------------------------------------------------------------------------------------------------------------------------------------------------------------------------------------------------------------------------------------------------------------------------------------------------------------------------------------------------------------------------------------------------|-----------------------------|
| Consensus_HERV-H/1-8613<br>chr4_91045770-91046171/1-402<br>AC226758.3_c17895-11593/1-6303<br>AC210774.3_7565-13867/1-6303 | TGGATCCTCTACCTACATGTGTCTA CCTGCTAATTGGACAGGCACATGCGACTAGTTTTCTTACCCCCAAAATTC AATTTGCCAGTGGGACTGAGAGCTCCCTGTTCCCTCTA TGACAC TGACATGACAAAAAGGGTTATTCCACTAATTA                                                                                                                                                                                                                                                                                                                                                                                                                                                                  | 7426<br>41<br>5552<br>5552  |
| Consensus_HERV-H/1-8613<br>chr4_91045770-91046171/1-402<br>AC226758.3_c17895-11593/1-6303<br>AC210774.3_7565-13867/1-6303 | CCCTGATGGTTGGTTT AGGACTTTCTGCCCTCCACTGTTGCTCTCGGTA CTGGAATAGCAGTCA TTTCAACCTCTGT CACGACCTTCGCTAGCCGTGT AATGACTTCTCTGCTAGCATCACAGATGTGCCAAACTTTATCAGTCTCCAGGCT                                                                                                                                                                                                                                                                                                                                                                                                                                                                | 7581<br>41<br>5552<br>5552  |
| Consensus_HERV-H/1-8613<br>chr4_91045770-91046171/1-402<br>AC226758.3_c17895-11593/1-6303<br>AC210774.3_7565-13867/1-6303 | AAAGTGA CTCTTTAGCTGCAGTGTCTCCAAAAACCGCTCAGGCCCTTGA CTTACTCACTGCTGAAAAAGGAGGACTGTGTATA TTC TTAATGAA GACTGTGTTTTTACCTAAAACAACC TGGCTGGTGTATGA CAACA TAAAAAACTCAA                                                                                                                                                                                                                                                                                                                                                                                                                                                               | 7736<br>41<br>5552<br>5552  |
| Consensus_HERV-H/1-8613<br>chr4_91045770-91046171/1-402<br>AC226758.3_c17895-11593/1-6303<br>AC210774.3_7565-13867/1-6303 | GGAAAGAGACCCAAAACTTGCCAAACCAAGCAAGTAA TTAGCTGAAATCCCTTGGGCACTCTAA TTGATGCTCTGGTCTCTCCAA TTTCTTAGTCTCTTTAATACCCATTTTTCTCTTCTTTTATTTCGACCTTGTATCTTCCATTTAGTTT<br>-----TATGCTGAACCTCTTGGGCACTCTCTAA TTGGATGCTCTGGTCTCTCCAA TTTCTTAGTCTCTTTAATACCTGTTTTCTCTTCTTTATTTCGACCTTGTGTCTTCCATTTAGTTT<br>-----TATGCTGAACCTCTTGGGCACTCTCTAA TTGGATGCTCTGGTCTCTCCAA TTTCTTAGTCTCTTTAATACCTGTTTTCTCTTCTTTATTTCGACCTTGTGTCTTCCATTTAGTTT                                                                                                                                                                                                      | 7891<br>41<br>5670<br>5670  |
| Consensus_HERV-H/1-8613<br>chr4_91045770-91046171/1-402<br>AC226758.3_c17895-11593/1-6303<br>AC210774.3_7565-13867/1-6303 | CTCAATTCATCCAAAACTGTA TCCAGGCCATCACCAATCA TTTTATACGACAAATGTTTCTTCTAA CAA CCCCACAAATCA CCCCCTTACCACAGATCTCCCTTTCAGCTTAA TCTCTCCCACTCTAGGTTCCCA TGCCACCCCTAATACCGCTT<br>TTCAATTCATA CAAAACTGCATCCAGGCCATCACCAATCA TTTCTACACAAAGTGTTCCTTCTAA CAA CCCCACAAATCA CCCCCTTACCACAAATCTTCTTTCAGCTTAA TCTCTCCCACTCTAGGTTCCCA CCA CCCCCTAATCCCGCTG<br>TTCAATTCATA CAAAACTGCATCCAGGCCATCACCAATCA TTTCTACACAAAGTGTTCCTTCTAA CAA CCCCACAAATCA CCCCCTTACCACAAATCTTCTTTCAGCTTAA TCTCTCCCACTCTAGGTTCCCA CCA CCCCCTAATCCCGCTG                                                                                                                   | 8046<br>41<br>5825<br>5825  |
| Consensus_HERV-H/1-8613<br>chr4_91045770-91046171/1-402<br>AC226758.3_c17895-11593/1-6303<br>AC210774.3_7565-13867/1-6303 | GAAGCAGCCCTGAGAAACATCAGCCATTCTCTCTCCATACCA CCCCCAAAAATTTTCA CTGCCAACACTTCAACACTATTTTATTTTTCTTATTAATATAAGAAGGCAGGAATGTCAGGCCCTTCAGCCCAAGCTAAGCCATCACATCCC<br>GAAGCAGCCCTGAGAAACATCAGCCATTCTCTCTCCATACCA CCCCCAACACTTCAACACTATTTTATTTTTCTTATTAATATAAGAAGA CAGGAATGTCAGGCCCTTCAGCCCAAG<br>GAAGCAGCCCTGAGAAACATCAGCCATTCTCTCTCCATACCA CCCCCAACACTTCAACACTATTTTATTTTTCTTATTAATATAAGAAGA CAGGAATGTCAGGCCCTTCAGCCCAAG                                                                                                                                                                                                               | 8201<br>41<br>5942<br>5942  |
| Consensus_HERV-H/1-8613<br>chr4_91045770-91046171/1-402<br>AC226758.3_c17895-11593/1-6303<br>AC210774.3_7565-13867/1-6303 | CTGTGACTAGCACATATACGCCAGATGGCC TGAAGTAACTGAAGAATCA CAAAGAGTGAAAA TGCCCTGCCACTTAACTGATGACATTCACCCACAAAAGAGTGAAAA TGCCGGTCTTTCGCTTAAAGTATGACATTA CTTTGTGAAA<br>-----CTGCACATATACATCCAGATGGCC TGAAGCAAGTGAAGAAT-----CACAAAATAAGTGAAAA TGCCGGTCTTTCGCTTAACTGATGACATTA CTTTGTGAAA<br>-----CTGCATATATACATCCAGATGGCC TGAAGCAAGTGAAGAAT-----CACAAAAGAGTGAAAA TGCCGGTCTTTCGCTTAACTGATGACATTA CTTTGTGAAA<br>-----CTGCATATATACATCCAGATGGCC TGAAGCAAGTGAAGAAT-----CACAAAAGAGTGAAAA TGCCGGTCTTTCGCTTAACTGATGACATTA CTTTGTGAAA                                                                                                             | 8356<br>141<br>6042<br>6042 |
| Consensus_HERV-H/1-8613<br>chr4_91045770-91046171/1-402<br>AC226758.3_c17895-11593/1-6303<br>AC210774.3_7565-13867/1-6303 | GTCTTTCTGGCTCATCTGGCTCAAAAAGCTCCCTACTGAGCACCTTGCGGACCCCACTCCTGCCGCCAGAGAACACCCCCCTTTGACTGTAATTTTCTTTACCTACCCAAATCC TATAAAACAGCCCCACCCCTATCTCCCTTTGCT<br>TTCTTCTCTGGCTC-----AGAA GCTCCCCATTGAGCACCTTTGTGACCCCTGCCCTGCCGCCAGAGAA-----CCCCCTTGA CTGTAATTTTCCATTATCTACCCAAATCC TGTAAAACAGCCCCACCCCTATCTCCCTTTGCT<br>TTCTTCTCTGGCTC-----AGAA GCTCCCCATTGAGCACCTTTGTGACCCCTGCCCTGCCGCCAGAGAA-----CCCCCTTGA CTGTAATTTTCCATTATCTACCCAAATCC TGTAAAACAGCCCCACCCCTATCTCCCTTTGCT<br>TTCTTCTCTGGCTC-----AGAA GCTCCCCATTGAGCACCTTTGTGACCCCTGCCCTGCCGCCAGAGAA-----CCCCCTTGA CTGTAATTTTCCATTATCTACCCAAATCC TGTAAAACAGCCCCACCCCTATCTCCCTTTGCT | 8511<br>281<br>6182<br>6182 |
| Consensus_HERV-H/1-8613<br>chr4_91045770-91046171/1-402<br>AC226758.3_c17895-11593/1-6303<br>AC210774.3_7565-13867/1-6303 | GACTCTCTTTCTGACTCAGCCCGCTGCACCCAGGTGATT-AAAAGCTTTATTTGCTCACACAAGCCTGTTTGGTGGTCTCTTTCACACGGACGGCATGACA----- 8613<br>GACTCTCTTTCTGACTCAGCCCGCTGCACCCAGGTGATTAAAAGCTTTATTTGCTCACACAAGCCTGTTTGGTGGTCTCTTTCACACGGATGCA TGTGAAAAATTAACCCCAAGATTTT 402<br>GACTCTCTTTCTGACTCAGCCCGCTGCACCCAGGTGATTAAAAGCTTTATTTGCTCACACAAGCCTGTTTGGTGGTCTCTTTCACACGGATGCA TGTGAAAAATTAACCCCAAGATTTT 6303<br>GACTCTCTTTCTGACTCAGCCCGCTGCACCCAGGTGATTAAAAGCTTTATTTGCTCACACAAGCCTGTTTGGTGGTCTCTTTCACACGGATGCA TGTGAAAAATTAACCCCAAGATTTT 6303                                                                                                            |                             |

3' LTR

TSD Flanking seq

Additional file 6: Alignment of HERV-H consensus with 4q22.1\_H8 solo LTR and provirus. The target site duplications (TSD) is marked in red. The 5' and 3'LTRs are highlighted in pink. The HERV-H consensus sequence is from Repbase (LTR7 and HERVH).
