# Supplementary material for: Variation in proviral content among human genomes mediated by LTR recombination
Source: PubMed Central journal article supplement (PMC6298018; doi:10.1186/s13100-018-0142-3), 2018-12-18
Supplement: 13100_2018_142_MOESM7_ESM.pdf [file 13100_2018_142_MOESM7_ESM.pdf]

|                             |                                                                                                                                                                                                                                                                                                                                                                                                                                                                                                                                                                                     |      |
|-----------------------------|-------------------------------------------------------------------------------------------------------------------------------------------------------------------------------------------------------------------------------------------------------------------------------------------------------------------------------------------------------------------------------------------------------------------------------------------------------------------------------------------------------------------------------------------------------------------------------------|------|
| Consensus_HERV-H/1-8613     | <b>C</b> TCTTTTT <b>C</b> A <b>T</b> CA <b>A</b> AT <b>C</b> CA <b>A</b> AA <b>A</b> CC <b>C</b> AG <b>C</b> CA <b>G</b> TT <b>C</b> AT <b>G</b> GC <b>T</b> CA <b>T</b> TC <b>G</b> GC <b>A</b> GC <b>A</b> ACC <b>T</b> GC <b>A</b> GC <b>G</b> TT <b>A</b> CA <b>G</b> CC <b>T</b> AG <b>A</b> CC <b>T</b> AA <b>A</b> AG <b>T</b> CA <b>A</b> AG <b>G</b> CC <b>G</b> T <b>T</b> AT <b>C</b> CT <b>C</b> AA <b>T</b> TA <b>C</b> A <b>T</b> TT <b>T</b> TT <b>A</b> CC <b>CA</b> AT <b>C</b> T <b>G</b> CT <b>C</b> CA <b>AA</b> C <b>A</b> TT <b>A</b> AA <b>T</b> AA <b>A</b> | 2106 |
| chr5_7262317-7262762/21-466 | -----                                                                                                                                                                                                                                                                                                                                                                                                                                                                                                                                                                               | 20   |
| AC226159.3_c6295-555/1-5741 | <b>C</b> TCTTTTT <b>C</b> A <b>T</b> CA <b>A</b> AT <b>C</b> CA <b>A</b> AA <b>A</b> CC <b>C</b> AG <b>C</b> CA <b>G</b> TT <b>C</b> AT <b>G</b> GC <b>T</b> CA <b>T</b> TC <b>G</b> GC <b>A</b> GC <b>A</b> ACC <b>T</b> GC <b>A</b> GC <b>G</b> TT <b>A</b> CA <b>G</b> CC <b>T</b> AG <b>A</b> CC <b>T</b> AA <b>A</b> AG <b>T</b> CA <b>A</b> AG <b>G</b> CC <b>G</b> T <b>T</b> AT <b>C</b> CT <b>C</b> AA <b>T</b> TA <b>C</b> A <b>T</b> TT <b>T</b> TT <b>A</b> CC <b>CA</b> AT <b>C</b> T <b>G</b> CT <b>C</b> CA <b>AA</b> C <b>A</b> TT <b>A</b> AA <b>T</b> AA <b>A</b> | 2096 |
| Consensus_HERV-H/1-8613     | <b>A</b> CT <b>C</b> CA <b>AA</b> AA <b>T</b> TA <b>A</b> AT <b>T</b> C <b>T</b> GG <b>CC</b> T <b>C</b> AA <b>AC</b> CC <b>C</b> CA <b>CA</b> AG <b>G</b> AT <b>T</b> AA <b>TT</b> AA <b>CC</b> T <b>C</b> AC <b>CT</b> TC <b>AA</b> GG <b>T</b> GT <b>CA</b> AA <b>-</b> TA <b>AT</b> GA <b>AAA</b> -----                                                                                                                                                                                                                                                                         | 2233 |
| chr5_7262317-7262762/21-466 | -----                                                                                                                                                                                                                                                                                                                                                                                                                                                                                                                                                                               | 20   |
| AC226159.3_c6295-555/1-5741 | <b>A</b> CT <b>C</b> CA <b>AA</b> AA <b>T</b> TA <b>A</b> AT <b>T</b> C <b>T</b> GG <b>CC</b> T <b>C</b> AA <b>AC</b> CC <b>C</b> CA <b>CA</b> AG <b>G</b> AT <b>T</b> AA <b>TT</b> AA <b>CC</b> T <b>C</b> AC <b>CT</b> TC <b>AA</b> GG <b>T</b> GT <b>CA</b> AA <b>TT</b> AA <b>T</b> AG <b>AG</b> T <b>AG</b> AG <b>G</b> CA <b>GC</b> CA <b>AG</b> TA <b>GC</b> AA <b>CA</b> TA <b>TT</b> TT <b>CT</b> GA <b>GT</b> TC <b>G</b> AT <b>TT</b> CT <b>TT</b> GC <b>CT</b> CA <b>CT</b> GT <b>GA</b> GA <b>CA</b> AA <b>CC</b> CC <b>AG</b> CT <b>CA</b>                            | 2251 |
| Consensus_HERV-H/1-8613     | <b>T</b> CT <b>CC</b> AG <b>CA</b> CA <b>C</b> AAG <b>AA</b> CT <b>T</b> CG <b>AA</b> AT <b>G</b> CC <b>T</b> CA <b>AC</b> CT <b>C</b> AG <b>G</b> T <b>G</b> CC <b>AG</b> GG <b>G</b> TT <b>C</b> CT <b>CC</b> CA <b>GA</b> AC <b>CT</b> TC <b>T</b> CC <b>CC</b> CA <b>GG</b> AG <b>CT</b> TC <b>G</b> CA <b>AG</b> T <b>CC</b> AG <b>AA</b> AT <b>CT</b> GG <b>CC</b> AC <b>T</b> GG <b>G</b> CC <b>AA</b> GG <b>AA</b> T <b>G</b> CC <b>CA</b> CA <b>GA</b> CC <b>AG</b> GA <b>TT</b> CT <b>CC</b> T <b>CA</b> AG <b>CT</b> GT <b>AT</b> CC <b>CA</b> T                         | 2388 |
| chr5_7262317-7262762/21-466 | -----                                                                                                                                                                                                                                                                                                                                                                                                                                                                                                                                                                               | 20   |
| AC226159.3_c6295-555/1-5741 | <b>T</b> CT <b>CC</b> AG <b>CA</b> CA <b>C</b> AAG <b>AA</b> CT <b>CC</b> -AA <b>AC</b> GC <b>CT</b> GA <b>AC</b> CG <b>C</b> AG <b>T</b> GC <b>CA</b> GG <b>G</b> TT <b>T</b> CT <b>CC</b> AG <b>AA</b> CT <b>CC</b> T <b>CC</b> CC <b>CA</b> GG <b>AG</b> CT <b>TC</b> CA <b>AG</b> T <b>CC</b> GG <b>AA</b> AT <b>CT</b> GG <b>CC</b> AC <b>T</b> GG <b>G</b> CC <b>AA</b> GG <b>AA</b> T <b>G</b> CC <b>CA</b> AG <b>CC</b> CA <b>AG</b> TT <b>CT</b> TC <b>T</b> AG <b>CC</b> AT <b>GT</b> CC <b>CA</b> T                                                                      | 2405 |
| Consensus_HERV-H/1-8613     | <b>C</b> TCTGTGGG <b>A</b> CC <b>CC</b> CA <b>T</b> TA <b>AA</b> AA <b>T</b> CA <b>GA</b> CT <b>G</b> TT <b>CA</b> AC <b>T</b> CA <b>CC</b> T <b>G</b> GC <b>AG</b> CC <b>AC</b> TT <b>CC</b> AG <b>AG</b> CC <b>CC</b> CG <b>AA</b> CT <b>TA</b> GC <b>CC</b> AA <b>GG</b> CT <b>CT</b> CG <b>AC</b> T <b>GA</b> CC <b>CC</b> TT <b>CT</b> GA <b>T</b> CT <b>TT</b> CT <b>GG</b> CT <b>TA</b> GC <b>AG</b> CT <b>GA</b> CA <b>CT</b> G <b>CC</b> AG <b>AT</b> CG <b>CC</b> T <b>CG</b> AA <b>G</b>                                                                                 | 2543 |
| chr5_7262317-7262762/21-466 | -----                                                                                                                                                                                                                                                                                                                                                                                                                                                                                                                                                                               | 20   |
| AC226159.3_c6295-555/1-5741 | <b>C</b> TGTGTGGG <b>A</b> CC <b>CC</b> CA <b>T</b> CT <b>GA</b> AA <b>AT</b> T <b>G</b> CA <b>CT</b> G <b>TT</b> CA <b>AC</b> T <b>CA</b> CC <b>T</b> GC <b>AG</b> CC <b>AC</b> TT <b>CC</b> AG <b>AG</b> CC <b>CC</b> CG <b>AA</b> CT <b>TA</b> GC <b>CC</b> AA <b>GG</b> CT <b>CT</b> CG <b>AC</b> T <b>GA</b> CC <b>CC</b> TT <b>CT</b> GA <b>T</b> CT <b>TT</b> CT <b>GG</b> CT <b>TA</b> GC <b>AG</b> CT <b>GA</b> CA <b>CT</b> G <b>CC</b> AG <b>AT</b> CG <b>CC</b> T <b>CG</b> AA <b>G</b>                                                                                 | 2560 |
| Consensus_HERV-H/1-8613     | <b>C</b> CT <b>CA</b> GG <b>AC</b> CA <b>T</b> CA <b>C</b> AG <b>AT</b> GC <b>T</b> CC <b>AG</b> TA <b>ACT</b> CT <b>CA</b> CA <b>GT</b> AG <b>GG</b> GT <b>AA</b> GT <b>CT</b> GT <b>CC</b> CC <b>T</b> TC <b>T</b> AA <b>T</b> CA <b>AT</b> TA <b>GG</b> AG <b>GT</b> AC <b>CC</b> CA <b>T</b> GC <b>CA</b> TA <b>TT</b> AC <b>CT</b> TT <b>CT</b> TT <b>CA</b> GG <b>CC</b> CT <b>GT</b> TT <b>CC</b> TT <b>G</b> CC <b>T</b> CCA <b>T</b> AA <b>CT</b> GT <b>T</b> GT <b>GG</b> GT <b>AT</b> T <b>G</b> AG <b>CC</b> CA                                                         | 2698 |
| chr5_7262317-7262762/21-466 | -----                                                                                                                                                                                                                                                                                                                                                                                                                                                                                                                                                                               | 20   |
| AC226159.3_c6295-555/1-5741 | <b>C</b> CT <b>CA</b> GG <b>AC</b> CA <b>T</b> CA <b>C</b> AG <b>AT</b> GC <b>T</b> CC <b>AG</b> TA <b>ACT</b> CT <b>CA</b> CA <b>GT</b> AG <b>GG</b> GT <b>AA</b> GT <b>CT</b> GT <b>CC</b> CC <b>T</b> TC <b>T</b> AA <b>T</b> CA <b>AT</b> TA <b>GG</b> AG <b>GT</b> AC <b>CC</b> CA <b>T</b> GC <b>CA</b> TA <b>TT</b> AC <b>CT</b> TT <b>CT</b> TT <b>CA</b> GG <b>CC</b> CT <b>GT</b> TT <b>CC</b> TT <b>G</b> CC <b>T</b> CCA <b>T</b> AA <b>CT</b> GT <b>T</b> GT <b>GG</b> GT <b>AT</b> T <b>G</b> AG <b>CC</b> CA                                                         | 2711 |
| Consensus_HERV-H/1-8613     | <b>G</b> GC <b>TT</b> CT <b>AA</b> AC <b>CT</b> CT <b>T</b> AA <b>AA</b> CT <b>CC</b> CC <b>AA</b> CT <b>CT</b> AG <b>TA</b> CC <b>AA</b> CT <b>T</b> AG <b>CA</b> AA <b>T</b> CT <b>CT</b> TT <b>TA</b> AG <b>CA</b> CT <b>CC</b> TT <b>TT</b> AG <b>TT</b> AT <b>CC</b> CA <b>CT</b> TC <b>G</b> CC <b>CA</b> GT <b>CC</b> TT <b>TA</b> GG <b>CC</b> GA <b>G</b> AC <b>ACT</b> TC <b>AA</b> CT <b>AA</b> TT <b>A</b> CT <b>GC</b> TT <b>CC</b> CT <b>GA</b> CT <b>ATT</b> CT <b>GG</b> ACT <b>AC</b>                                                                              | 2853 |
| chr5_7262317-7262762/21-466 | -----                                                                                                                                                                                                                                                                                                                                                                                                                                                                                                                                                                               | 20   |
| AC226159.3_c6295-555/1-5741 | <b>G</b> GC <b>TT</b> CT <b>AA</b> AC <b>CT</b> CT <b>T</b> AA <b>AA</b> CT <b>CC</b> CC <b>AA</b> CT <b>CT</b> AG <b>TA</b> CC <b>AA</b> CT <b>T</b> AG <b>CA</b> AA <b>T</b> CT <b>CT</b> TT <b>TA</b> AG <b>CA</b> CT <b>CC</b> TT <b>TT</b> AG <b>TT</b> AT <b>CC</b> CA <b>CT</b> TC <b>G</b> CC <b>CA</b> GT <b>CC</b> TT <b>TA</b> GG <b>CC</b> GA <b>G</b> AC <b>ACT</b> TC <b>AA</b> CT <b>AA</b> TT <b>A</b> CT <b>GC</b> TT <b>CC</b> CT <b>GA</b> CT <b>ATT</b> CT <b>GG</b> ACT <b>AC</b>                                                                              | 2862 |
| Consensus_HERV-H/1-8613     | <b>A</b> GC <b>T</b> AC <b>AT</b> CT <b>CA</b> TT <b>G</b> CT <b>G</b> CC <b>TT</b> CT <b>CC</b> CA <b>AT</b> CC <b>AA</b> AG <b>CC</b> CT <b>CT</b> TT <b>G</b> CA <b>T</b> CT <b>TT</b> ---CT <b>T</b> GT <b>AT</b> CC <b>CC</b> CA <b>AC</b> TT <b>AA</b> CC <b>CA</b> AG <b>T</b> ATA <b>AG</b> ATA <b>CC</b> CT <b>CT</b> AT <b>TC</b> CC <b>CT</b> CT <b>TT</b> GG <b>T</b> GA <b>CC</b> AA <b>CT</b> CA <b>T</b> GC <b>AC</b> CC <b>CT</b> TA <b>CC</b> AT <b>CT</b> CA <b>TT</b> AA <b>AA</b> CC <b>T</b> AA <b>T</b> CA <b>C</b>                                           | 3005 |
| chr5_7262317-7262762/21-466 | -----                                                                                                                                                                                                                                                                                                                                                                                                                                                                                                                                                                               | 20   |
| AC226159.3_c6295-555/1-5741 | <b>A</b> GC <b>T</b> AC <b>AT</b> CT <b>CA</b> TT <b>G</b> CC <b>AT</b> CT <b>TT</b> CC <b>CA</b> AT <b>CC</b> AA <b>AG</b> CC <b>CT</b> CT <b>TT</b> G <b>CA</b> T <b>CT</b> TT <b>---</b> CT <b>T</b> GT <b>AT</b> CC <b>CC</b> CA <b>AC</b> TT <b>AA</b> CC <b>CA</b> AG <b>T</b> ATA <b>AG</b> ATA <b>CC</b> CT <b>CT</b> AT <b>TC</b> CC <b>CT</b> CT <b>TT</b> GG <b>T</b> GA <b>CC</b> AA <b>CT</b> CA <b>T</b> GC <b>AC</b> CC <b>CT</b> TA <b>CC</b> AT <b>CT</b> CA <b>TT</b> AA <b>AA</b> CC <b>T</b> AA <b>T</b> CA <b>C</b>                                            | 3017 |
| Consensus_HERV-H/1-8613     | <b>T</b> CT <b>T</b> AC <b>CC</b> GG <b>CT</b> CA <b>AT</b> GC <b>CA</b> AG <b>AT</b> CC <b>AT</b> CC <b>CA</b> CA <b>G</b> CA <b>T</b> CT <b>TT</b> AA <b>AA</b> GG <b>AT</b> TA <b>AA</b> AA <b>CT</b> GT <b>TA</b> CA <b>CT</b> CG <b>CC</b> T <b>G</b> CT <b>AG</b> AG <b>CA</b> T <b>G</b> CC <b>CT</b> TT <b>TA</b> AA <b>GG</b> CC <b>TA</b> TA <b>AA</b> CT <b>CT</b> CT <b>TA</b> CA <b>AT</b> CC <b>CC</b> CA <b>TT</b> TT <b>TA</b> CC <b>T</b> GT <b>CC</b> T <b>AG</b> AA <b>CC</b> AG <b>CA</b> AG <b>CC</b> TT <b>A</b>                                              | 3160 |
| chr5_7262317-7262762/21-466 | -----                                                                                                                                                                                                                                                                                                                                                                                                                                                                                                                                                                               | 20   |
| AC226159.3_c6295-555/1-5741 | <b>T</b> CT <b>T</b> AC <b>CC</b> GG <b>CT</b> CA <b>AT</b> GC <b>CA</b> AG <b>AT</b> CC <b>AT</b> CC <b>CA</b> CA <b>G</b> CA <b>T</b> CT <b>TT</b> AA <b>AA</b> GG <b>AT</b> TA <b>AA</b> AA <b>CT</b> GT <b>TA</b> CA <b>CT</b> CG <b>CC</b> T <b>G</b> CT <b>AG</b> AG <b>CA</b> T <b>G</b> CC <b>CT</b> TT <b>TA</b> AA <b>GG</b> CC <b>TA</b> TA <b>AA</b> CT <b>CT</b> CT <b>TA</b> CA <b>AT</b> CC <b>CC</b> CA <b>TT</b> TT <b>TA</b> CC <b>T</b> GT <b>CC</b> T <b>AG</b> AA <b>CC</b> AG <b>CA</b> AG <b>CC</b> TT <b>A</b>                                              | 3170 |
| Consensus_HERV-H/1-8613     | <b>C</b> AG---G <b>TT</b> CA <b>GG</b> AT <b>CT</b> GT <b>GT</b> CT <b>T</b> AT <b>CA</b> TA <b>GA</b> AA <b>TT</b> GT <b>TT</b> CC <b>CT</b> AT <b>CC</b> AC <b>CC</b> T <b>G</b> T <b>G</b> GT <b>CT</b> GA <b>CC</b> CA <b>TA</b> TA <b>CT</b> CT <b>CT</b> AT <b>CC</b> CA <b>AT</b> AC <b>CT</b> CC <b>CT</b> CA <b>AA</b> CC <b>CA</b> TT <b>AT</b> TC <b>T</b> GT <b>TT</b> CT <b>AG</b> AT <b>CT</b> CA <b>AA</b> CA <b>T</b> GC <b>TT</b> CT <b>TT</b> CA <b>TA</b> CC <b>CT</b> TT <b>AC</b>                                                                              | 3311 |
| chr5_7262317-7262762/21-466 | -----                                                                                                                                                                                                                                                                                                                                                                                                                                                                                                                                                                               | 20   |
| AC226159.3_c6295-555/1-5741 | <b>C</b> AG <b>GT</b> TA <b>GT</b> TC <b>AG</b> AA <b>T</b> CT <b>AG</b> CC <b>CT</b> TA <b>CA</b> CC <b>AA</b> AT <b>GT</b> TT <b>TT</b> GC <b>CT</b> AT <b>CC</b> AC <b>CC</b> CT <b>G</b> T <b>T</b> GC <b>CA</b> AA <b>AC</b> CA <b>TA</b> TA <b>CT</b> CT <b>CT</b> TA <b>CC</b> CA <b>AT</b> AC <b>CT</b> CC <b>CT</b> CA <b>AA</b> CC <b>CA</b> TT <b>AT</b> TC <b>T</b> GT <b>T</b> CT <b>GG</b> AT <b>CT</b> CA <b>AA</b> CA <b>T</b> GC <b>TT</b> CT <b>TT</b> TA <b>-----</b> TT <b>GC</b>                                                                               | 3317 |
| Consensus_HERV-H/1-8613     | <b>A</b> CC <b>CT</b> TC <b>AA</b> CC <b>CA</b> GC <b>CT</b> CT <b>TT</b> CG <b>TTTT</b> CA <b>CC</b> T <b>G</b> GA <b>CT</b> GA <b>CC</b> CT <b>GA</b> CA <b>CC</b> CA <b>TC</b> AG <b>T</b> CC <b>CA</b> GC <b>AG</b> CT <b>TA</b> CC <b>T</b> GG <b>G</b> CT <b>GT</b> AA <b>T</b> GC <b>T</b> GC <b>AA</b> GG <b>TT</b> CA <b>GG</b> GG <b>CA</b> GC <b>CT</b> TA <b>TT</b> AT <b>TT</b> CA <b>GC</b> CA <b>AG</b> CT <b>CT</b> TT <b>CT</b> CA <b>T</b> GA <b>TT</b> TA <b>CT</b> TT <b>CT</b> TT <b>CC</b> CC <b>CC</b>                                                       | 3466 |
| chr5_7262317-7262762/21-466 | -----                                                                                                                                                                                                                                                                                                                                                                                                                                                                                                                                                                               | 20   |
| AC226159.3_c6295-555/1-5741 | <b>A</b> CC <b>CT</b> TC <b>CA</b> CC <b>CA</b> GC <b>CT</b> CT <b>TT</b> CC <b>CT</b> TT <b>CA</b> CT <b>TA</b> GA <b>CT</b> GA <b>CC</b> CT <b>GA</b> CA <b>CC</b> CA <b>TC</b> AG <b>G</b> CT <b>CA</b> GC <b>AA</b> TT <b>AC</b> CT <b>GG</b> CT <b>GT</b> AT <b>TT</b> GC <b>CA</b> AG <b>G</b> CT <b>TT</b> TC <b>AG</b> AT <b>AG</b> CC <b>CC</b> CA <b>TT</b> ACT <b>TT</b> CA <b>G</b> TC                                                                                                                                                                                  | 3437 |
| Consensus_HERV-H/1-8613     | <b>T</b> CC <b>ACT</b> TC <b>CA</b> CC <b>T</b> TA <b>TT</b> CA <b>A</b> T <b>AT</b> TT <b>GG</b> T <b>GA</b> T <b>GT</b> CT <b>TT</b> CT <b>TT</b> GT <b>AG</b> CC <b>CC</b> CT <b>CC</b> TT <b>T</b> GA <b>T</b> CT <b>TT</b> CT <b>CA</b> CA <b>AG</b> CA <b>C</b> ACT <b>TT</b> CT <b>GC</b> CT <b>TC</b> AG <b>CA</b> TT <b>TA</b> TT <b>CT</b> CC <b>AA</b> GG <b>AT</b> AT <b>CC</b> CC <b>CT</b> CC <b>AA</b> AG <b>CT</b> CA <b>AA</b> T <b>GT</b> CT <b>TT</b> CT <b>CC</b> AT <b>CC</b> GT <b>TA</b> CC <b>TA</b> C                                                      | 3621 |
| chr5_7262317-7262762/21-466 | -----                                                                                                                                                                                                                                                                                                                                                                                                                                                                                                                                                                               | 20   |
| AC226159.3_c6295-555/1-5741 | -----                                                                                                                                                                                                                                                                                                                                                                                                                                                                                                                                                                               | 3469 |
| Consensus_HERV-H/1-8613     | <b>C</b> TT <b>GG</b> CA <b>T</b> AA <b>TT</b> CT <b>TC</b> ATA <b>AA</b> AA <b>CA</b> CA <b>C</b> GT <b>CC</b> CC <b>T</b> CC <b>CT</b> CT <b>CT</b> GA <b>T</b> AG <b>T</b> GT <b>CT</b> GA <b>CT</b> GA <b>T</b> CT <b>CT</b> CA <b>AA</b> CC <b>CA</b> AC <b>CC</b> CT <b>CT</b> CA <b>AA</b> CA <b>CA</b> CA <b>CT</b> CT <b>TT</b> CC <b>AT</b> CC <b>T</b> AG <b>CA</b> TT <b>TA</b> TT <b>CT</b> CC <b>AA</b> GG <b>AT</b> AT <b>CC</b> CC <b>CT</b> CC <b>AA</b> AG <b>CT</b> CA <b>AA</b> T <b>GT</b> CT <b>TT</b> CT <b>CC</b> AT <b>CC</b> GT <b>TA</b> CC <b>TA</b> C  | 3776 |
| chr5_7262317-7262762/21-466 | -----                                                                                                                                                                                                                                                                                                                                                                                                                                                                                                                                                                               | 20   |
| AC226159.3_c6295-555/1-5741 | <b>C</b> TC <b>GG</b> CA <b>T</b> AA <b>TT</b> CT <b>TC</b> ATA <b>AA</b> AA <b>CA</b> CA <b>C</b> GT <b>CC</b> CC <b>T</b> CC <b>CT</b> CT <b>CT</b> GA <b>T</b> AG <b>T</b> GT <b>CT</b> GA <b>CT</b> GA <b>T</b> CT <b>CT</b> CA <b>AA</b> CC <b>CA</b> AC <b>CC</b> CT <b>CT</b> CA <b>AA</b> CA <b>CA</b> CA <b>CT</b> CT <b>TT</b> CC <b>AT</b> CC <b>T</b> AG <b>CA</b> TT <b>TA</b> TT <b>CT</b> CC <b>AA</b> GG <b>AT</b> AT <b>CC</b> CC <b>CT</b> CC <b>AA</b> AG <b>CT</b> CA <b>AA</b> T <b>GT</b> CT <b>TT</b> CT <b>CC</b> AT <b>CC</b> GT <b>TA</b> CC <b>TA</b> C  | 3582 |
| Consensus_HERV-H/1-8613     | <b>A</b> AC <b>AA</b> AA <b>CC</b> AT <b>T</b> ATA <b>AA</b> AA <b>CT</b> CA <b>CA</b> AA <b>AG</b> AA <b>CC</b> TA <b>GT</b> TA <b>CC</b> CC <b>CA</b> TA <b>GA</b> T <b>CC</b> T <b>AA</b> AT <b>CT</b> GT <b>TT</b> CC <b>CC</b> CA <b>CT</b> CC <b>CT</b> TT <b>CC</b> AT <b>TC</b> CT <b>TT</b> GA <b>AG</b> CA <b>AG</b> CT <b>TT</b> AG <b>AG</b> CA <b>CT</b> GC <b>CT</b> CC <b>CA</b> CT <b>TA</b> AG <b>CT</b> CT <b>CC</b> CT <b>GA</b> CT <b>CA</b> CC <b>CA</b> CA <b>C</b> TT <b>TT</b> CA <b>TT</b> CA <b>CA</b>                                                    | 3931 |
| chr5_7262317-7262762/21-466 | -----                                                                                                                                                                                                                                                                                                                                                                                                                                                                                                                                                                               | 20   |
| AC226159.3_c6295-555/1-5741 | -----                                                                                                                                                                                                                                                                                                                                                                                                                                                                                                                                                                               | 3582 |

|                             |                                                                                                                                                                  |      |
|-----------------------------|------------------------------------------------------------------------------------------------------------------------------------------------------------------|------|
| Consensus_HERV-H/1-8613     | CAGCTGAAAGTGCAGGGCTGTGCAGTCAAAATTCACACAAGGACCGGGATCGCATCCGTAGCCTTTTGTCCAAACAACTTGACCTTACTGTTTTAGGCTGGCCATCATGTCCTCAATGCAGCGTCTGCTGCCACCCCTAAATACCTTTTAGAGGCC     | 4086 |
| chr5_7262317-7262762/21-466 | -----CAGTGTGGTCAAAATTCACACAAGAGCCAGGGCCGTAACCTGTAGCCTTTTGTCCAAACAACTTGACCTTACTTTTTTAGCCTAGCCCTCATGTCGCAAGTAGCAGCTGCCGTGCTTTAATACCTTTTAGAGGCC                     | 20   |
| AC226159.3_c6295-555/1-5741 | -----CAGTGTGGTCAAAATTCACACAAGAGCCAGGGCCGTAACCTGTAGCCTTTTGTCCAAACAACTTGACCTTACTTTTTTAGCCTAGCCCTCATGTCGCAAGTAGCAGCTGCCGTGCTTTAATACCTTTTAGAGGCC                     | 3721 |
| Consensus_HERV-H/1-8613     | CTCAAAATCACAAACTATGCTCAACTATTCTCTACAGCTCTCATAATTTCCAAAATCTATTTTCTTCTCACACCTGACACATATACTTTCTGCTCCCCGGCTCCTTCAGATATACTCACTCCATTATCTCCCACAATTACCATTATTCTTG          | 4241 |
| chr5_7262317-7262762/21-466 | CTAAAAATCACAAACTAGCCTCAACTCA--ATCTACATTTCTCATAACTTTCCAAAATCCAATTTCTTCTCATACCCTGATGCATATACTTTCTGCTCCCCGGCTCCTTCAGCTGTAACTCACTTTTCTTAAAGTCCCACAATTACCATTGTTCTTG    | 20   |
| AC226159.3_c6295-555/1-5741 | CTAAAAATCACAAACTAGCCTCAACTCA--ATCTACATTTCTCATAACTTTCCAAAATCCAATTTCTTCTCATACCCTGATGCATATACTTTCTGCTCCCCGGCTCCTTCAGCTGTAACTCACTTTTCTTAAAGTCCCACAATTACCATTGTTCTTG    | 3874 |
| Consensus_HERV-H/1-8613     | GCCTGGACTTCAATCCGGCTCCACATTATTCGGATACCAACCTGACCCCTCATGACTGCTCTCTGATCCACCTGACGTTCACCCCATTCCCCACAATTCCTTCTGCCCTGTTTTCAACCTGATCAACCTTGGTTATATGATGGCAGT              | 4396 |
| chr5_7262317-7262762/21-466 | GCCCAGACTTCAATCCGGCTCCTACATTATTCGGATACCAACCTGACCCCTCATGACTGCTCTCTGATCCACCTGACGTTCACCCCATTCCCCACAATTCCTTCTTCTGTTCTCAACCTGATCAACCTTGTATTTATGATGTCAGT               | 20   |
| AC226159.3_c6295-555/1-5741 | GCCCAGACTTCAATCCGGCTCCTACATTATTCGGATACCAACCTGACCCCTCATGACTGCTCTCTGATCCACCTGACGTTCACCCCATTCCCCACAATTCCTTCTTCTGTTCTCAACCTGATCAACCTTGTATTTATGATGTCAGT               | 4029 |
| Consensus_HERV-H/1-8613     | TCCACAGGCTAATCGCCACTCACCAAGCAAGGCAGGATATGCTATGAACTAGTTGCCCTTAATCAAGCCCTCACTCTTGCAAAAGGACTACGTGTCAATATCTATCTGATTCTAAATATGCCCTTCAATATCTGCACCACTATGCCGTCATA         | 4551 |
| chr5_7262317-7262762/21-466 | TCCACTAGGCTAATCGCCACACACCAAGCAAGGCAGGCTATGCTATAG--                                                                                                               | 20   |
| AC226159.3_c6295-555/1-5741 | TCCACTAGGCTAATCGCCACACACCAAGCAAGGCAGGCTATGCTATAG--                                                                                                               | 4078 |
| Consensus_HERV-H/1-8613     | TGGCTGAAAGAGGTTTCTCACTACACAAGTGTCTCCATCAATTAATGCCCTTTAAAGAAAACCTGCTCAAGGCTGCTTTACTCCAAAGGAGCTGGGGTCAATTCCTGCAAGGGGCATCAAAAGACTTCAGATCCCATTGCTCTAGGCAAT           | 4706 |
| chr5_7262317-7262762/21-466 | -----                                                                                                                                                            | 20   |
| AC226159.3_c6295-555/1-5741 | -----                                                                                                                                                            | 4078 |
| Consensus_HERV-H/1-8613     | GCTTATGCTGATAAAGTGGCTAGACAAGCAGCTAGCTCTCCAACTTTTGTCCCTCATGGCCAGTTTTTCTCTTCACATCCGTCCTCCCACTACTCCACAGTCAAACCTTCAAGCTTCCCCCGCAAGGTAAATGGTCTTAGA                    | 4861 |
| chr5_7262317-7262762/21-466 | -----                                                                                                                                                            | 20   |
| AC226159.3_c6295-555/1-5741 | -----                                                                                                                                                            | 4078 |
| Consensus_HERV-H/1-8613     | CCAAAGGAAAATATCTCCTTCCAGCCTCACAGGCCCATTCATTCTGTGCTATTTCAAACTTTTCCATGTAAGGTTACAAGCCACTAGCCTGTCTTTAGGACCCTCTCATTCTTTCCATCATGGAAAATCTATCTCAAGGAGATCACTTCTC          | 5016 |
| chr5_7262317-7262762/21-466 | -----TACAAGCCACTAGCCCGCCTTTAGAACTTATTCTTTCCATCTGTGAAAATCTAACCTCAAGGAAATACCTCTC                                                                                   | 20   |
| AC226159.3_c6295-555/1-5741 | -----TACAAGCCACTAGCCCGCCTTTAGAACTTATTCTTTCCATCTGTGAAAATCTAACCTCAAGGAAATACCTCTC                                                                                   | 4157 |
| Consensus_HERV-H/1-8613     | AGTGTTCATCTGCTATTCTGCTACCCCTCAGGCATTGTTAGGCCCTCCCTCCCTTCTCACATAAAGCTCGGGGATTGGCCCCGCCCCAGGACTGGCAAAATGACTTTTACTC-ACATGCCCTCGGGTCAGAAAATCAAAATATCTCTTAGTCTG       | 5170 |
| chr5_7262317-7262762/21-466 | AGTGTTCATCTGCTATTCTACTACTCCTCAGGATTAATCAGGCCCTCCCTCCATACACATCAAGCTTGAAGATTGGCCCCCAAGGACTGGCAAAATGACTTTTACTCAACATGCCCTGAGTCAGATAGCTAAAATACCTCTTAGTCTA             | 20   |
| AC226159.3_c6295-555/1-5741 | AGTGTTCATCTGCTATTCTACTACTCCTCAGGATTAATCAGGCCCTCCCTCCATACACATCAAGCTTGAAGATTGGCCCCCAAGGACTGGCAAAATGACTTTTACTCAACATGCCCTGAGTCAGATAGCTAAAATACCTCTTAGTCTA             | 4312 |
| Consensus_HERV-H/1-8613     | GGTAGACACTTTTACATGGGTGGGTAGAGGCCCTTCCCATAGATCTGAGAGGCCACCAGGCTATTTCTCCCTTCTGTCAAGACATAATTCCTTGGTTTGGCCTTCCCCTCTATACAGCTGTATAACGGACCAAGCCCTTACTAGTTAAATCA         | 5325 |
| chr5_7262317-7262762/21-466 | GGTAGACACTTTCCATGGATAGGTACAGG-----GTCTGAGAGGCCACCACAGTCAATTTCTCCCTTCTGTCAAGACATAATTCCTAGTTTAGCCTTCCCACCTCTATACAGCTGTATAACGGACCAAGCCCTTACTAGTTAAATCA              | 20   |
| AC226159.3_c6295-555/1-5741 | GGTAGACACTTTCCATGGATAGGTACAGG-----GTCTGAGAGGCCACCACAGTCAATTTCTCCCTTCTGTCAAGACATAATTCCTAGTTTAGCCTTCCCACCTCTATACAGCTGTATAACGGACCAAGCCCTTACTAGTTAAATCA              | 4454 |
| Consensus_HERV-H/1-8613     | CCCAAGCAGTTTCTCAGGCTCTGGTATTCAAGTGAACCTTCATATCCCTTAACTCCTCAATCTTCAGGAAAGGTAAAACCGACTAATGGTCTTTTAAAAGACACCTCACCAGCTCAGCCTCCAACCTAAAAAGGATGGACAGTACTTTTA           | 5480 |
| chr5_7262317-7262762/21-466 | GCCAAGCAGTTTTTTCAGGCTCTTATGATTCAGTGAACCTTTTATCCCTTACGGTCCCTCCGTCTTCAGGAAAAGTAAAGGACTAAAAGGCTTTTTAAAAACACACCTCCCCAAGCTCAGCCCAACCTAAAAAGGACTGGACAAATCTTTTA         | 20   |
| AC226159.3_c6295-555/1-5741 | GCCAAGCAGTTTTTTCAGGCTCTTATGATTCAGTGAACCTTTTATCCCTTACGGTCCCTCCGTCTTCAGGAAAAGTAAAGGACTAAAAGGCTTTTTAAAAACACACCTCCCCAAGCTCAGCCCAACCTAAAAAGGACTGGACAAATCTTTTA         | 4609 |
| Consensus_HERV-H/1-8613     | CCTCTGCCCTTCTCAGAATTAGAACCCTGCTCGAGATGCTACAGGGTACAGTCCATTTGAACTTTTATATGGAAGCCTTTCTTGGTTGGTCCCAACCTCATCCAGACACCAAGCCCTCTAGGCCACTATCTTCCAGCTCCCAACAGGCTAG          | 5635 |
| chr5_7262317-7262762/21-466 | CCACTTTCCCTTCTCAGAAGTCAAGCTGCCCTCAGAATGCTACAGGATACAGCCCAATTTGAGTCTCTGTATAGATGCTCCTTTTATATAGGCCCAAGTCTCATTCCAGACACCAGC-----                                       | 20   |
| AC226159.3_c6295-555/1-5741 | CCACTTTCCCTTCTCAGAAGTCAAGCTGCCCTCAGAATGCTACAGGATACAGCCCAATTTGAGTCTCTGTATAGATGCTCCTTTTATATAGGCCCAAGTCTCATTCCAGACACCAGC-----                                       | 4727 |
| Consensus_HERV-H/1-8613     | GCAAGGAAAGTCAAGGCTGCTAACTTCTCTTCCCTACTCCAGATCCCCAGCCATATGAAAGACACTTACCTGGACGATCAAGTTCTTGGTTAAGAAATCGACCCCTCAAACTCTACAACTCGATGGACTGGACCCCTACTTAGTCATCTATAGTA      | 5790 |
| chr5_7262317-7262762/21-466 | -----                                                                                                                                                            | 20   |
| AC226159.3_c6295-555/1-5741 | -----                                                                                                                                                            | 4727 |
| Consensus_HERV-H/1-8613     | CCCCTGACTGCCGTCGCCCTGCAGGATCCTCCCCACTGGGTTCACCAATTCCAGAAATAAAGCTGTGTCCATTGGAAGCCAGCCATAACCTTCTCCTCCCTTCTCCTTCTGGAAAGTGCATTAATCTCCCCACTTCCCCTAAACTCCTCGTATTTCTGAA | 5945 |
| chr5_7262317-7262762/21-466 | -----                                                                                                                                                            | 20   |
| AC226159.3_c6295-555/1-5741 | -----                                                                                                                                                            | 4727 |

|                             |                                                                                                                                                                                                                                                                                            |      |
|-----------------------------|--------------------------------------------------------------------------------------------------------------------------------------------------------------------------------------------------------------------------------------------------------------------------------------------|------|
| Consensus_HERV-H/1-8613     | GAA CAGTAA TAA CCC TTA TGA GCC TAA TACA TCC CTT CA TTC TATT AGGTC TGT TTT GCT TTA CCC TAC TTT TTT GCA CAG GGC TTT ATG AACT CAC CCCC ACCA CTT AGGC TGA GCC CAAAAA ATCT TGT CAT C C C T A C T A T T T T C T G T C C A G T                                                                    | 6100 |
| chr5_7262317-7262762/21-466 | -----                                                                                                                                                                                                                                                                                      | 20   |
| AC226159.3_c6295-555/1-5741 | -----CAACTT GACT GTGCC CAAAAA ATTTGTCATCCCTACTATCTTCTGTCTAGT                                                                                                                                                                                                                               | 4780 |
| Consensus_HERV-H/1-8613     | CATA CT CCT ATT CTCTGC TCTCAACTACTTATAAATGCCGTA CTCTTGTTTACACTGCTGGTTTACACTGTTTCTTCAAGCCATCACAGCTGATATCTCTTGGTGTATCCCCAAACCGCCACTTTAATTC C C C T T T A G A T G G G T A G A T G A T C                                                                                                       | 6255 |
| chr5_7262317-7262762/21-466 | -----                                                                                                                                                                                                                                                                                      | 20   |
| AC226159.3_c6295-555/1-5741 | -----CATA CT CCT ATT CACCATTCTCAACTACTCATACATGCCCTGCTCTTGTTTACACTGCCGTTTACACTGTTTTTCAAGCCATCACAGCTGATATCTCTTGGTGTATCCCCAAACCGCCACTTTAA-----CTCTTGAAGTAAATAAATAATC                                                                                                                          | 4931 |
| Consensus_HERV-H/1-8613     | TTTGTGGCAGGGCACCCTCCAACTCTCCACCCTGATGAAAGTTCATTCTTTACTTTTATACTCTCTTATTCTCATTC C C C A T T C T T A T G C C A C C T T T T G C C T C T C C C C A G C T A T C C C A C C A C T A T C A A C C T T A C C C A T T C T C C T A G C                                                                  | 6410 |
| chr5_7262317-7262762/21-466 | -----                                                                                                                                                                                                                                                                                      | 20   |
| AC226159.3_c6295-555/1-5741 | -----TTTGTGAAAGGAC-----                                                                                                                                                                                                                                                                    | 4945 |
| Consensus_HERV-H/1-8613     | TGCTTCTAATCCCTCCTTACTGAACAACCTGCTGGCTTTTGCAATTTCCCTTTTCCAGTGCCACATAGCTGTCCCTGCCCTACAGACAGACTGGGCTACATCTCCTGTCTCCTTACCCCTCTGAACCTTCC T T T T A C A G C C C T C A C C T T T A C C C T C                                                                                                      | 6565 |
| chr5_7262317-7262762/21-466 | -----                                                                                                                                                                                                                                                                                      | 20   |
| AC226159.3_c6295-555/1-5741 | -----                                                                                                                                                                                                                                                                                      | 4945 |
| Consensus_HERV-H/1-8613     | CTAAGGAACCTATTTACTTTCTAGACAGGTCCAGCAAGACTTTCCAGACATTTCACTACGCAAGCTGCCGCCCTCTCCGCACCTATTTAAAAAACCTTTCTCCTTATATTAACCTACTCCCCCATATTTGGACCCTCACAAACAACCT                                                                                                                                       | 6720 |
| chr5_7262317-7262762/21-466 | -----                                                                                                                                                                                                                                                                                      | 20   |
| AC226159.3_c6295-555/1-5741 | -----                                                                                                                                                                                                                                                                                      | 4945 |
| Consensus_HERV-H/1-8613     | ATTATTCTGTGCTGCTCCTTTATGATCTCTTGGCAAAGACCCACTGGAATTC C C C T A G G T A A T A T T T C A C C T T C T T G A T G T T C C T T T A C T C T T T A T C C A A A G C C C A A C T A C A C A T C A C T G A A A C A A T T G G A G C C T C C A G C C C A T A T                                           | 6875 |
| chr5_7262317-7262762/21-466 | -----                                                                                                                                                                                                                                                                                      | 20   |
| AC226159.3_c6295-555/1-5741 | -----                                                                                                                                                                                                                                                                                      | 4945 |
| Consensus_HERV-H/1-8613     | TACAGACAAGCCCTCTGTCAATACGACAAACTCAAAACATTAGCAGTAAATTGTTGCTTAGGAAAGACACTTACCCTGTATTTCACTCCATCCCTGGCTACCCTCCCTTGCTCATCAGACTCTCCTCCCAGGCCCTCTCTTGTTTACTTATAC                                                                                                                                  | 7030 |
| chr5_7262317-7262762/21-466 | -----                                                                                                                                                                                                                                                                                      | 20   |
| AC226159.3_c6295-555/1-5741 | -----                                                                                                                                                                                                                                                                                      | 4945 |
| Consensus_HERV-H/1-8613     | CCAGCCCCAAAATAACAGTGAAAGGTTGCTCATAGATAATCAACGTTTTCTGTACATCATGAAAAATTGAACATCCTCCTCTATGCA GTTACCCCATCAGTCCCCATTACAACCTTGACAGCTGCCGCCCTAGCTGGATCCCTAGGAGTCTGG                                                                                                                                 | 7185 |
| chr5_7262317-7262762/21-466 | -----                                                                                                                                                                                                                                                                                      | 20   |
| AC226159.3_c6295-555/1-5741 | -----                                                                                                                                                                                                                                                                                      | 4945 |
| Consensus_HERV-H/1-8613     | GTACAAAGACCCCTTTCCAGCACTCCTTTTACATTTTTTACTTTACATCTCCAGTTTTGCCCTACACAAAGGCTCTTCTTCCCTCTGTGGATCCTCTACCTACATGTGTCTACTGTCTAATGGACAGGCACATGCACACTAGTTTTCCCTAACCC                                                                                                                                | 7340 |
| chr5_7262317-7262762/21-466 | -----                                                                                                                                                                                                                                                                                      | 20   |
| AC226159.3_c6295-555/1-5741 | -----                                                                                                                                                                                                                                                                                      | 4945 |
| Consensus_HERV-H/1-8613     | CAAAATTC AATTTGCCAGTGGGACTGAAGAGCTCCCTGTTCC C C C T C A T G A C A C T G A C A T G A C A A A A A G G G T T A T T C C A C T A A T T A C C T T G A T G G T T G G T T A G G A C T T T C T G C C T C C A C T G T T G C T C G G T A C T G G A A T A C C A G T C A T T T C A A                    | 7495 |
| chr5_7262317-7262762/21-466 | -----                                                                                                                                                                                                                                                                                      | 20   |
| AC226159.3_c6295-555/1-5741 | -----                                                                                                                                                                                                                                                                                      | 4945 |
| Consensus_HERV-H/1-8613     | CCTCTGTACGACCTTCCGTAGCCGTCTAATGACTTCTCTGTAGCATCACAGATGTGCCACAACTTTTATCAGTCTCCAGGC T A A A G T T G A C T C T T T A G C T G C A G T T G T C C T C C A A A A C C G C T G A G G C C T T G A C T T A C T C A C T G C T G A A A A A                                                              | 7650 |
| chr5_7262317-7262762/21-466 | -----                                                                                                                                                                                                                                                                                      | 20   |
| AC226159.3_c6295-555/1-5741 | -----                                                                                                                                                                                                                                                                                      | 4945 |
| Consensus_HERV-H/1-8613     | GGAGGACTGTGTATATTTTAAATGAAAGACTGTTGTTTTTACC T A A A A C A A C C T G G C C T G G T G T A T G A C A A C A T A A A A A A A C T C A A G G A A A G A G A C C A A A A A C T T G C C A C C A A G C A A G T A A T T A T G C T G A A T C C C C T T G G G C A C T C T A A T T G                      | 7805 |
| chr5_7262317-7262762/21-466 | -----                                                                                                                                                                                                                                                                                      | 20   |
| AC226159.3_c6295-555/1-5741 | -----TATGCTGAATCTCCTTAGGCA-----CTCTAATTA                                                                                                                                                                                                                                                   | 4975 |
| Consensus_HERV-H/1-8613     | CATGCTCTGGGTCTCCCAATCTTAGTCC T T T A A T A C C C A T T T T T C T C C T T C T T T T A T T C G G A C C T T G T A T C T T C C A T T T A G T T T C T A A T T C A A T T C A T C C A A A A C T G T A T C C A G G C C A T C A C C A A T C A T T T T A T A C G A C A A A T G T T T C T T A A C A A | 7960 |
| chr5_7262317-7262762/21-466 | -----                                                                                                                                                                                                                                                                                      | 20   |
| AC226159.3_c6295-555/1-5741 | -----GATGCTCTGGGTCTCCCAATCTTAGACCTTTTATACC T G T T T T C T C C T T C T G T T A -----T T C C A T T T A G T T T T C A A T T C A T G C A A A A C C A T A T C C A G G C C A T C A C C A A T C A T T C T A A A T G A C A A A T G T C T T C T A A C A G                                          | 5115 |

```

Consensus_HERV-H/1-8613      CCCCACAAATATCACCCCTTACCACAAATCTCCCTTCAGCTTAATCTCTCCCACTTAGGTTCCCAAGCCACCCCTAAATACCGCTTGAAAGCAGCCCTGAGAAACATCACCCATTCTCTCTCCATACCACCCCAAAAAATTTTCACTGCCCA 8115
chr5_7262317-7262762/21-466  -----TGTCAGGCCCTCTGAGCCCAAGCTAAGCCATCATATCCCCGTGACCTGACGTAACATCCATCCAGATGGCCGG----- 20
AC226159.3_c6295-555/1-5741 TCCCACAAATATCACCCCTTACACAAAATCTCCCTTCAGCTTAATCTCTCCCACTTAGGTTCCCAAGCCACCCCTAAATACCGCTTGAAAGCAGCCCTGAGAAACATTTGCTCAT--TATCTCTCCATACCACCCCAAAAAATTTTCACTATCCCA 5267

                                     3' LTR
                                     * *****
Consensus_HERV-H/1-8613      ACACTTCAACACTATTTTATTTTCTTATTAAATAAAGAAAGGCAGGAAATGTCAGGCCCTCTGAGCCCAAGCTAAGCCATCACATCCCCGTGACCTAGCACATATACGCCAGATGGCTGAAAGTAACGAAAGTCACAAAGAGTGAAAATGCC 8270
chr5_7262317-7262762/21-466  -----TGTCAGGCCCTCTGAGCCCAAGCTAAGCCATCATATCCCCGTGACCTGACGTAACATCCATCCAGATGGCCGG----- 91
AC226159.3_c6295-555/1-5741 ACACTTCAACACTATTTTCTTATTAAATAAAGAAAGGCAGGAAATGTCAGGCCCTCTGAGCCCAAGCTAAGCCATCATATCCCCGTGACCTGACGTAACATCCATCCAGATGGCCGG----- 5386

                                     * *****
Consensus_HERV-H/1-8613      TGCCTCCACTTAACTGATGACATTCCACCACAAAAGAAAGTGAATAAGGCCGCTTTCCTGCTTAAAGTATGACATTACCTTGTAAGTCCCTTTTCCGGCTCATCCTGGCTCAAAAAGCTCCCTACTGAGCACCTTGCCACCCCACTCCTGCC 8425
chr5_7262317-7262762/21-466  -TTCTGCTTAACTGATGACATTCCACCACAAAAGAAAGTGAATAAGGCCGCTTTCCTGCTTAACTGATGACATTGCTTTGTGAAATTCCTTCCCTGGCTCATCCTGGCTC-AAAAGCTCCCTACTGAGCACCTTGCCACCCCACT-CTGCC 243
AC226159.3_c6295-555/1-5741 -TTCTGCTTAACTGATGACATTCCACCACAAAAGAAAGTGAATAAGGCCGCTTTCCTGCTTAACTGATGACATTGCTTTGTGAAATTCCTTCCCTGGCTCATCCTGGCTC-AAAAGCTCCCTACTGAGCACCTTGCCACCCCACT-CTGCC 5538

                                     *****
Consensus_HERV-H/1-8613      CGCCAGAGAACACCCCTTTGACTGTAAATTTCCCTTACCTACCCAAATCCTATAAAACAGCCCAACCCCTATCTCCCTTGGCTGACTCTCTTTCCGGACTCAGCCCGCCTGCACCCAGGTGATTAAAAGCTTTATTGCTCACACAAAGCCTG 8580
chr5_7262317-7262762/21-466  TGCCAGAGAACAA-CCCCCTTTGACTATAATTTCCCTTATCTACTACATCCTATAAAATGGCCCAACCCCTATCTCCCTTGGCTGA--CTCTTTCCGGACTCAGCCCGCCTGCACCCAGGTGATTAAAAGCTTTATTGCTCACACAAAGCCTG 395
AC226159.3_c6295-555/1-5741 TGCCAGAGAACAA-CCCCCTTTGACTATAATTTCCCTTATCTACTACATCCTATAAAATGGCCCAACCCCTATCTCCCTTGGCTGA--CTCTTTCCGGACTCAGCCCGCCTGCACCCAGGTGATTAAAAGCTTTATTGCTCACACAAAGCCTG 5690

                                     *****
Consensus_HERV-H/1-8613      TTTGGTGGTCTCTTCACACGGACGGCAGTACA----- 8613
chr5_7262317-7262762/21-466  TTTGATGGTCTCTTCACACGGACGGCAGTAAAATTACAACTTGAAAAAT 446
AC226159.3_c6295-555/1-5741 TTTGATGGTCTCTTCACACGGACGGCAGTAAAATTACAACTTGAAAAAT 5741

```

Additional file 7: Alignment of HERV-H consensus with 5p15.31\_H2 solo LTR and provirus. The target site duplications (TSD) are marked in red. The 5' and 3'LTRs are highlighted in pink. The HERV-H consensus sequence is from Repbase (LTR7 and HERVH).
