# Supplementary material for: Variation in proviral content among human genomes mediated by LTR recombination
Source: PubMed Central journal article supplement (PMC6298018; doi:10.1186/s13100-018-0142-3), 2018-12-18
Supplement: 13100_2018_142_MOESM9_ESM.pdf [file 13100_2018_142_MOESM9_ESM.pdf]

**Additional file 9. HERV candidates identified as provirus to solo LTR variants using *findsoloLTR* pipeline**

| HERV-name  | Hg38 coordinates          | #Individuals | Read depth (%) | Avg. mappability for the provirus | DGV Accession        | Presence of Refseq/ LINC RNA/ envORF           | Expression type in hiPSC | Previously identified               |
|------------|---------------------------|--------------|----------------|-----------------------------------|----------------------|------------------------------------------------|--------------------------|-------------------------------------|
| 1p31.1_K3  | chr1:75377086-75383458    | NA           | 5-47           | 0.055                             | essv3655324          | *env                                           |                          | (28)                                |
| 1q22_K2    | chr1:155626666-155635845  | NA           | 5-15           | 0.07                              |                      | TCONS_I2_00002667<br>TCONS_I2_00001553<br>*env |                          | This study                          |
| 11q22.1_K1 | chr11:101695063-101704528 | NA           | 0-32           | 0.066                             | essv4365330          | *env                                           |                          | (28)                                |
| 11q23.3_K1 | chr11:118721015-118730174 | 2            | 46-50          | 0.177                             |                      | *env                                           |                          | This study                          |
| 12q14.1_K1 | chr12:58327459-58336915   | NA           | 3-45           | 0.072                             | nssv585653           | *env                                           |                          | (28)                                |
| 3q13.2_K2  | chr3:113024277-113033435  | NA           | 2-30           | 0.077                             | esv1096242           | *env                                           |                          | (38)                                |
| 3q27.2_K1  | chr3:185562548-185571727  | NA           | 5-43           | 0.084                             |                      | *env                                           |                          | (43)                                |
| 5p13.3_K2  | chr5:30486653-30496098    | 77           | 6-50           | 0.145                             | nsv499389            |                                                |                          | This study (PCR verified)           |
| 5q33.3_K1  | chr5:156657706-156666885  | NA           | 4-27           | 0.062                             | \$essv12110787       | *env                                           |                          | (43)                                |
| 6q14.1_K1  | chr6:77716945-77726366    | NA           | 5-43           | 0.075                             | nsv499600            | TCONS_I2_00024299<br>*env                      |                          | (28)                                |
| 7p22.1_K1  | chr7:4582426-4591897      | NA           | 5-20           | 0.058                             | *nssv619986 (+240bp) | *env                                           |                          | (28,38)                             |
| 8p23.1_K7  | chr8:7497875-7507337      | NA           | 0-49           | 0.064                             | \$nsv1075518         | *env                                           |                          | This study (likely a pre-insertion) |
| 11q13.2_H5 | chr11:68633778-68639439   | 11           | 6-49           | 0.198                             | esv2672143           |                                                | MA                       | This study                          |
| 2q34_H4    | chr2:209078020-209084376  | 95           | 4-49           | 0.173                             | nsv498954            |                                                | MA                       | This study (PCR verified)           |

|             |                           |    |       |       |                         |                                                       |    |            |
|-------------|---------------------------|----|-------|-------|-------------------------|-------------------------------------------------------|----|------------|
| 2p14_H2     | chr2:64252414-64257646    | 55 | 6-48  | 0.125 | esv2670157              | NR_120420.1<br>TCONS_I2_00013678<br>TCONS_I2_00013679 | HA | This study |
| 3q26.31_H8  | chr3:175827485-175836221  | 2  | 3-45  | 0.271 |                         |                                                       |    | This study |
| 4q31.21_H2  | chr4:145698823-145703503  | 2  | 6-36  | 0.189 |                         |                                                       | HA | This study |
| Xq21.33_H1  | chrX:94698820-94704626    | 2  | 6     | 0.126 |                         |                                                       | HA | This study |
| Xq22.1_H4   | chrX:99158722-99165186    | 3  | 6-7   | 0.216 |                         |                                                       |    | This study |
| 13q21.32_H1 | chr13:66141332-66147036   | 15 | 9-49  | 0.145 | esv3632499              |                                                       | MA | This study |
| 1q31.1_H1   | chr1:185948279-185954216  | 4  | 29-39 | 0.075 |                         |                                                       | MA | This study |
| 1q32.2_H3   | chr1:210111090-210116207  | 4  | 45-49 | 0.374 | esv3588715              |                                                       |    | This study |
| 1q42.2_H3   | chr1:232118115-232123945  | 23 | 40-50 | 0.09  |                         |                                                       | HA | This study |
| 1p32.3_H6   | chr1:54897904-54903584    | 1  | 47.34 | 0.207 | esv3586106              |                                                       |    | This study |
| 1p31.3_H3   | chr1:65643207-65648034    | 1  | 49.88 | 0.142 |                         |                                                       | MA | This study |
| 10q21.1_H3  | chr10:53492723-53504727   | 3  | 45-48 | 0.097 |                         |                                                       | MA | This study |
| 10q21.1_H4  | chr10:54166676-54172501   | 21 | 41-50 | 0.111 |                         |                                                       | MA | This study |
| 10p14_H2    | chr10:6797083-6802953     | 79 | 40-50 | 0.135 | *nsv1130992<br>(+245bp) | TCONS_00018113<br>TCONS_00018114<br>TCONS_00017700    | MA | This study |
| 11q24.3_H2  | chr11:130753498-130759137 | 2  | 49    | 0.151 | essv1431265<br>8        |                                                       | MA | This study |
| 11p14.3_H1  | chr11:23183934-23189744   | 6  | 32-46 | 0.157 | esv3547446              |                                                       | MA | This study |
| 12p13.2_H1  | chr12:10332976-10338643   | 5  | 32-49 | 0.137 |                         |                                                       | MA | This study |
| 12p12.1_H2  | chr12:25163213-25169508   | 1  | 42    | 0.254 | essv1441492<br>0        |                                                       |    | This study |

|             |                          |     |       |       |                        |             |    |            |
|-------------|--------------------------|-----|-------|-------|------------------------|-------------|----|------------|
| 13q14.11_H2 | chr13:42868004-42873158  | 48  | 44-49 | 0.11  |                        | NR_126389.1 | HA | This study |
| 13q21.1_H1  | chr13:55578228-55584087  | 150 | 21-49 | 0.117 | nssv3984585            |             | HA | This study |
| 13q22.3_H1  | chr13:77933223-77939379  | 1   | 43    | 0.247 | essv14801756           |             |    | This study |
| 13q31.1_H1  | chr13:79274082-79279821  | 1   | 49.21 | 0.14  |                        |             |    | This study |
| 14q21.3_H1  | chr14:47104197-47108765  | 40  | 42-50 | 0.098 |                        |             | HA | This study |
| 15q26.2_H4  | chr15:96871837-96877667  | 1   | 40    | 0.135 | *nssv2999175 (+866bp)  |             | HA | This study |
| 19q13.42_H1 | chr19:53831404-53837348  | 1   | 35    | 0.136 |                        |             | HA | This study |
| 2q24.1_H4   | chr2:156720084-156725844 | 2   | 46-49 | 0.167 |                        |             | MA | This study |
| 2q34_H1     | chr2:208215925-208221935 | 1   | 44    | 0.211 | *essv10832987 (+94bp)  |             |    | This study |
| 2q36.1_H5   | chr2:224296633-224302363 | 5   | 46-49 | 0.17  | essv10865359           |             |    | This study |
| 2p12_H2     | chr2:75213731-75219537   | 4   | 47-50 | 0.147 | nsv953151              |             | MA | This study |
| 2p12_H4     | chr2:76573625-76579704   | 1   | 49    | 0.142 |                        |             | MA | This study |
| 2p12_H5     | chr2:77088247-77094030   | 5   | 43-49 | 0.12  |                        |             | HA | This study |
| 20p12.1_H4  | chr20:13357880-13362689  | 7   | 42-49 | 0.122 |                        |             | HA | This study |
| 21p11.2_H7  | chr21:9847516-9850363    | 1   | 47    | -     |                        |             |    | This study |
| 3q22.3_H2   | chr3:137595601-137601190 | 1   | 43    | 0.226 | esv2741215             |             |    | This study |
| 3q27.3_H2   | chr3:187175504-187181262 | 2   | 49    | 0.091 |                        |             | HA | This study |
| 3q28_H10    | chr3:192071109-192076858 | 1   | 49    | 0.191 | *essv11273010 (+320bp) |             |    | This study |
| 3p24.3_H2   | chr3:20967541-20973231   | 5   | 20-50 | 0.201 |                        |             | MA | This study |

|            |                          |     |       |       |                               |                                                             |    |                           |
|------------|--------------------------|-----|-------|-------|-------------------------------|-------------------------------------------------------------|----|---------------------------|
| 3p14.3_H1  | chr3:54634484-54640204   | 2   | 39-49 | 0.132 | essv11015497                  | ESRG                                                        | HA | This study (PCR verified) |
| 3p12.3_H6  | chr3:78581212-78588919   | 218 | 39-50 | 0.135 | *nsv954897 (+261bp)           |                                                             | MA | This study                |
| 3p25.3_H3  | chr3:8177031-8182716     | 1   | 35    | 0.164 | *esv3561425 (+217bp)          |                                                             | MA | This study                |
| 4q26_H1    | chr4:115975700-115981225 | 1   | 48    | 0.147 | *nssv2996771 (+719bp)         | TCONS_I2_00021950                                           |    | This study                |
| 4q27_H1    | chr4:119993664-119999666 | 3   | 41-46 | 0.114 | *nsv949813 (+418bp, +279bp)   |                                                             | HA | This study                |
| 4q31.1_H1  | chr4:138927836-138933543 | 1   | 34    | 0.181 |                               | TCONS_00007856<br>TCONS_00007857                            |    | This study                |
| 4q32.3_H5  | chr4:166716125-166722054 | 1   | 48    | 0.13  | nssv2996802                   |                                                             | MA | This study                |
| 4q22.2_H1  | chr4:94084647-94089891   | 2   | 47-50 | 0.116 |                               |                                                             | MA | This study                |
| 5q21.2_H3  | chr5:104063635-104070481 | 1   | 49    | 0.21  | *essv12004941 (+472bp)        |                                                             | MA | This study                |
| 5p14.3_H3  | chr5:18668843-18674598   | 14  | 43-50 | 0.147 | *nssv2997714 (+351bp, +293bp) |                                                             | HA | This study                |
| 5q13.3_H2  | chr5:76357256-76363071   | 2   | 42-47 | 0.13  |                               |                                                             | MA | This study                |
| 6q22.1_H2  | chr6:115031793-115037619 | 6   | 30-45 | 0.117 | *essv12509186 (+326bp)        |                                                             | MA | This study                |
| 6q22.31_H9 | chr6:125701848-125707763 | 5   | 45-50 | 0.11  | *nssv2997515 (-757bp)         | TCONS_00011367                                              | HA | This study                |
| 6q23.2_H3  | chr6:131338800-131344564 | 4   | 41-50 | 0.159 | essv12552764                  |                                                             | MA | This study                |
| 6q23.2_H7  | chr6:131901550-131907417 | 24  | 39-50 | 0.129 | *nssv2997521 (+489bp)         | TCONS_I2_00025237<br>TCONS_I2_00025238<br>TCONS_I2_00025239 | HA | This study                |
| 6p22.3_H1  | chr6:16259012-16264893   | 5   | 43-50 | 0.139 | *essv12200615 (+72bp)         |                                                             | MA | This study                |
| 6p22.3_H3  | chr6:18754144-18759870   | 2   | 40-43 | 0.169 | essv12211245                  | TCONS_00012100                                              | MA | This study                |

|            |                          |    |       |       |                                        |                |    |            |
|------------|--------------------------|----|-------|-------|----------------------------------------|----------------|----|------------|
| 6p12.2_H1  | chr6:51938241-51944426   | 2  | 48    | 0.206 | essv1234952<br>1                       |                |    | This study |
| 6q15_H2    | chr6:90670205-90675442   | 1  | 49.5  | 0.086 |                                        |                | MA | This study |
| 6q16.1_H1  | chr6:93830156-93835749   | 20 | 41-50 | 0.096 | essv1246582<br>3                       |                | HA | This study |
| 8q23.3_H6  | chr8:115212253-115217978 | 1  | 40    | 0.116 |                                        |                | MA | This study |
| 9q33.1_H3  | chr9:115839178-115844929 | 2  | 38-45 | 0.094 |                                        | TCONS_00016140 | MA | This study |
| 9q21.13_H2 | chr9:74085583-74091436   | 1  | 48    | 0.125 | *essv599823<br>6<br>(-1172bp, -1691bp) |                | HA | This study |
| 9q21.33_H8 | chr9:87410694-87416706   | 1  | 49    | 0.114 |                                        |                | HA | This study |
| 9q22.2_H1  | chr9:90412695-90418349   | 43 | 41-49 | 0.113 |                                        | TCONS_00015842 | MA | This study |
| Xq23_H9    | chrX:114466672-114472531 | 7  | 46-49 | 0.116 |                                        |                | HA | This study |
| Xq23_H10   | chrX:114601272-114607242 | 65 | 41-50 | 0.09  |                                        |                | HA | This study |
| Xp22.32_H2 | chrX:4891614-4897331     | 1  | 11    | 0.114 |                                        |                | MA | This study |

Footnotes: #Individuals identified: NA: Not applicable: we did not calculate the number of individuals when the mappability is too low. DGV variant accession: Accessions marked with asterisks (\*) have either one or two boundaries outside the LTR or inside in the internal sequence. The presence of a single number within brackets next to accession shows that one breakpoint of DGV variant is not within the LTR. The presence of two numbers within the brackets shows that both breakpoints of the DGV variant are not within the LTRs. The numbers within the bracket next to accession indicate the how far the breakpoint is from the boundary of the provirus. (+) indicates break point is outside of LTR and (-) indicates break point is internal to the element from the boundary. Accessions marked with (\$) are indicative of a pre-integration allele as both breakpoints precisely lie at the outer boundaries of LTR. There could be multiple variants present in DGV; only one representative variant accession is given here. Previously identified: ) insertion polymorphism (pre-integration allele for the provirus) has been identified in (29). Presence of Refseq / LINC RNA / envORF: \*env encodes a complete envelope gene of > 400 amino acids according to Heidmann et al. (92). Expression type in hiPSCs: MA: moderately active, HA: Highly active, Expression type of full length HERVH identified in hiPSC lines and single cells derived from three individual hESC clones (63).
