# Supplementary material for: Variation in proviral content among human genomes mediated by LTR recombination
Source: PubMed Central journal article supplement (PMC6298018; doi:10.1186/s13100-018-0142-3), 2018-12-18
Supplement: 13100_2018_142_MOESM10_ESM.pdf [file 13100_2018_142_MOESM10_ESM.pdf]

**Additional file 10. List of primer sequences used for amplifying solo LTR and provirus alleles shown in Figure 3**

| <b>HERV_allele</b> | <b>Forward Primer (5' to 3')</b> | <b>Reverse Primer (5' to 3')</b> | <b>AT(°C)/<br/>ET (sec)</b> |
|--------------------|----------------------------------|----------------------------------|-----------------------------|
| 18q21.1_W2_solo    | GAGTGCACCTGTTAGGCTATTT           | TCTCCCTCACCTGCTTCTATC            | 52/60                       |
| 18q21.1_W2_env     | GAGTGCACCTGTTAGGCTATTT           | GCCCATGCTCCAATGTTAATG            | 51/60                       |
| 18q21.1_W2_gag     | GGACAGGTGCCTGGTAATTT             | TCTCCCTCACCTGCTTCTAT             | 52.8/60                     |
| 4q22.1_H8_solo     | ACACTTAGAAGACCTCCATCTTAAT        | TTGCCTGCATACACAATTCTTC           | 50.8/55                     |
| 4q22.1_H8_env      | CTTCAGCTTAATCTCTCCCACTC          | GACATGGAGCACCTGGAAA              | 51.7/50                     |
| 5p15.31_H2_env     | CTTCAGCTTAATCTCTCCCACTC          | CCCTTTATTTCTAGTAAGGCTTGTTG       | 51.6/51                     |
| 2q34_H4_solo       | GCAATAGTGATCTCGGGTCAAA           | CTTGTTCCAATGACGACCTGTA           | 51.8/70                     |
| 2q34_H4_env        | AGACACCAGACCGACTTAGA             | CTCCCTGACCACGTGATTATT            | 51.7/90                     |
| 3p14.3_H1_solo     | CCCTCACTTAGCTTCGTATTCTC          | GGTCTCCCTGACTATGGTTTC            | 51.7/45                     |
| 3p14.3_H1_gag      | CTTCCCTCACTTAGCTTCGTATT          | GAGATGTTTCTTGGGCTGGT             | 51.7/45                     |
| 5p13.3_K2_solo*    | CTGGGATGCAAGTCTTGTTTA            | TGTATTCTGCCATTACATTTTC           | 60.2/135                    |
| 5p13.3_K2_env*     | TGCAGGTGTAACCAACAG               | TGTATTCTGCCATTACATTTTC           | 60.2/135                    |

Footnotes: AT- Annealing temperature, ET- Extension time, PCR conditions for *Go Taq* PCR Master mix- Promega: an initial denaturation temperature of 95°C for 2 minutes, followed by 36 cycles of (i) denaturation at 95°C for 30 sec, (ii) annealing at 50-53°C for 30 sec, (iii) extension of 72°C for a minute per kilo base (see ET above) and a final extension of 72°C for 5 minutes. \*PCR conditions for *Platinum SuperFI* PCR Master Mix- Thermo Fisher Scientific: an initial denaturation temperature of 98°C for 30 seconds, followed by 35 cycles of (i) denaturation at 98°C for 10 sec, (ii) annealing at 60.2°C for 10 sec, (iii) extension of 72°C for 2 minutes 15 sec and a final extension of 72°C for 5 minutes
